# Supplementary material for: Identification of a TNF-TNFR-like system in malaria vectors (Anopheles stephensi) likely to influence Plasmodium resistance
Source: PubMed Central journal article supplement (PMC9646898; doi:10.1038/s41598-022-23780-y), 2022-11-09
Supplement: 41598_2022_23780_MOESM1_ESM.pdf [file 41598_2022_23780_MOESM1_ESM.pdf]

# **Identification of a TNF-TNFR-like system in malaria vectors (*Anopheles stephensi*) likely to influence *Plasmodium* resistance**

Subhashini Srinivasan<sup>1,\*</sup>, Chaitali Ghosh<sup>2!</sup>, Shrestha Das<sup>1!</sup>, Aditi Thakare<sup>1!</sup>, Siddharth Singh<sup>1</sup>, Apoorva Ganesh<sup>1</sup>, Harsh Mahawar<sup>1</sup>, Aadhya Jaisimha<sup>1</sup>, Mohanapriya Krishna<sup>1</sup>, Aritra Chattopadhyay<sup>1</sup>, Rishima Borah<sup>1</sup>, Vikrant Singh<sup>1</sup>, Soumya M<sup>2</sup>, Naveen Kumar<sup>2</sup>, Sampath Kumar<sup>2</sup>, Sunita Swain<sup>2,\*</sup>, and Suresh Subramani<sup>3</sup>

<sup>1</sup>Institute of Bioinformatics and Applied Biotechnology, Biotech Park, Electronic City Phase I, Bengaluru 560100, India

<sup>2</sup>Tata Institute for Genetics and Society (TIGS), Center at inStem, Bellary Road, GKVK Campus, Bengaluru 560065, India

<sup>3</sup>TIGS, University of California San Diego, La Jolla, CA 92093, USA

<sup>!</sup> these authors contributed equally to this paper

\* [sunita.swain@tigs.res.in](mailto:sunita.swain@tigs.res.in) and [ssubha@ibab.ac.in](mailto:ssubha@ibab.ac.in) (Corresponding Authors)

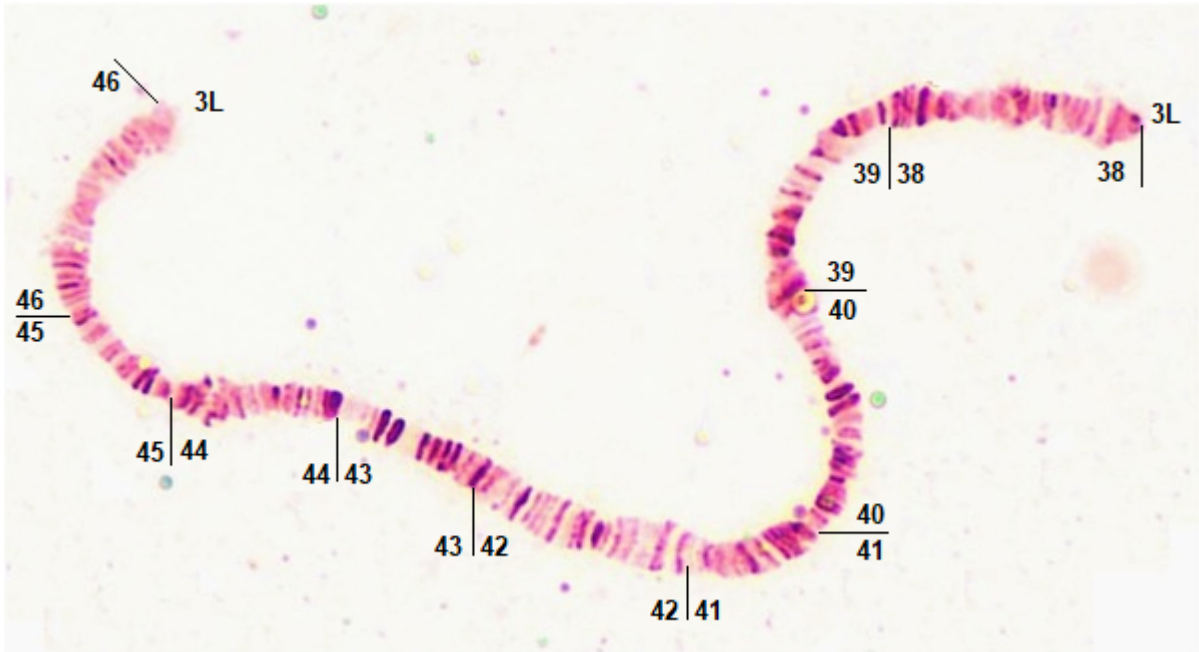

Supplementary figure 1 : Photomap showing the standard form of the 3Li region in the IndInt strain, supporting 52% homozygous for the standard form of 3Li.

78 bp :

| Database: IndInt_chr2R.fasta                   |          |                                                              |          |
|------------------------------------------------|----------|--------------------------------------------------------------|----------|
| 1 sequences; 55,427,671 total letters          |          |                                                              |          |
| Query= IndCh_Astel_HiC_Chr2R                   |          |                                                              |          |
| Length=55103326                                |          |                                                              |          |
| Sequences producing significant alignments:    |          | Score                                                        | E        |
|                                                |          | (Bits)                                                       | Value    |
| chr2R                                          |          | 331                                                          | 1e-90    |
| >chr2R                                         |          |                                                              |          |
| Length=55427671                                |          |                                                              |          |
| Score = 331 bits (179), Expect = 1e-90         |          |                                                              |          |
| Identities = 179/179 (100%), Gaps = 0/179 (0%) |          |                                                              |          |
| Strand=Plus/Minus                              |          |                                                              |          |
| Query                                          | 38082990 | GGCAGAAGTGAGTGAATGACTTAAATCTTTGAAATGAATTAGATGATTTAAATCATCACG | 38083049 |
| Sbjct                                          | 17244809 |                                                              | 17244750 |
| Query                                          | 38083050 | CAGCGTTATTTAGCTCACTTTTGATTTAATTCGCCATGCCGATTAACCACTCACTCACT  | 38083109 |
| Sbjct                                          | 17244749 |                                                              | 17244690 |
| Query                                          | 38083110 | ACTTTTAACTCACTCACTATGAATGGCTCTCTCGTGAATTAACGAGTGAGTTAAAGG    | 38083168 |
| Sbjct                                          | 17244689 |                                                              | 17244631 |

## 78 bp Reverse Complement :

Database: indint\_rev\_chr2R.fasta  
1 sequences; 55,427,671 total letters

Query= IndCh\_Astel\_HiC\_Chr2R

Length=55103326

| Sequences producing significant alignments: | Score (Bits) | E Value |
|---------------------------------------------|--------------|---------|
| chr2R                                       | 331          | 1e-90   |

>chr2R

Length=55427671

Score = 331 bits (179), Expect = 1e-90  
Identities = 179/179 (100%), Gaps = 0/179 (0%)  
Strand=Plus/Plus

|       |          |                                                              |          |
|-------|----------|--------------------------------------------------------------|----------|
| Query | 38082990 | GGCAGAAGTGAGTGAATGACTTAAATCTTTGAAATGAATTAGATGATTTAAATCATCACG | 38083049 |
|       |          |                                                              |          |
| Sbjct | 38182863 | GGCAGAAGTGAGTGAATGACTTAAATCTTTGAAATGAATTAGATGATTTAAATCATCACG | 38182922 |
| Query | 38083050 | CAGCGTTATTTGAGCTCACTTTTGATTTAATTCGCCATGCCGATTAACCACTCACTCACT | 38083109 |
|       |          |                                                              |          |
| Sbjct | 38182923 | CAGCGTTATTTGAGCTCACTTTTGATTTAATTCGCCATGCCGATTAACCACTCACTCACT | 38182982 |
| Query | 38083110 | ACTTTTTAACTCACTCACTATGAATGGCTCTCTCGTGAATTAACGAGTGAGTTAAAGG   | 38083168 |
|       |          |                                                              |          |
| Sbjct | 38182983 | ACTTTTTAACTCACTCACTATGAATGGCTCTCTCGTGAATTAACGAGTGAGTTAAAGG   | 38183041 |

## 8 bp :

Database: IndInt\_chr2R.fasta  
1 sequences; 55,427,671 total letters

Query= IndCh\_Astel\_HiC\_Chr2R

Length=55103326

| Sequences producing significant alignments: | Score (Bits) | E Value |
|---------------------------------------------|--------------|---------|
| chr2R                                       | 202          | 6e-52   |

>chr2R

Length=55427671

Score = 202 bits (109), Expect = 6e-52  
Identities = 109/109 (100%), Gaps = 0/109 (0%)  
Strand=Plus/Minus

|       |          |                                                              |          |
|-------|----------|--------------------------------------------------------------|----------|
| Query | 21514292 | ATTTAAGGTTGACCAATTCCTGAGAAACACGGGTAAGAATATAATCCAATCATATCTTTA | 21514351 |
|       |          |                                                              |          |
| Sbjct | 33742489 | ATTTAAGGTTGACCAATTCCTGAGAAACACGGGTAAGAATATAATCCAATCATATCTTTA | 33742430 |
| Query | 21514352 | GCGAGCTGCAAATTAGTGATTTTCCTAGAACACTGGCAACACCGCCAAC            | 21514400 |
|       |          |                                                              |          |
| Sbjct | 33742429 | GCGAGCTGCAAATTAGTGATTTTCCTAGAACACTGGCAACACCGCCAAC            | 33742381 |

## 8bp Reverse Complement :

Database: indint\_rev\_chr2R.fasta  
1 sequences; 55,427,671 total letters

Query= IndCh\_Astel\_HiC\_Chr2R

Length=55103326

| Sequences producing significant alignments: | Score (Bits) | E Value |
|---------------------------------------------|--------------|---------|
| chr2R                                       | 202          | 6e-52   |

>chr2R

Length=55427671

Score = 202 bits (109), Expect = 6e-52  
Identities = 109/109 (100%), Gaps = 0/109 (0%)  
Strand=Plus/Plus

```
Query 21514292 ATTTAAGGTTGACCAATTCCTGAGAAACACGGGTAAGAATATAATCCAATCATATCTTTA 21514351
          |||
Sbjct 21685183 ATTTAAGGTTGACCAATTCCTGAGAAACACGGGTAAGAATATAATCCAATCATATCTTTA 21685242

Query 21514352 GCGAGCTGCAAATTAGTGATTTTCCTAGAACACTGGCAACACCGCCAAC 21514400
          |||
Sbjct 21685243 GCGAGCTGCAAATTAGTGATTTTCCTAGAACACTGGCAACACCGCCAAC 21685291
```

*Supplementary figure 2 : Pairwise alignment using BLASTN showing the validation of 2Rb breakpoints between the IndCh and IndInt strains.*

**g22432.t1**

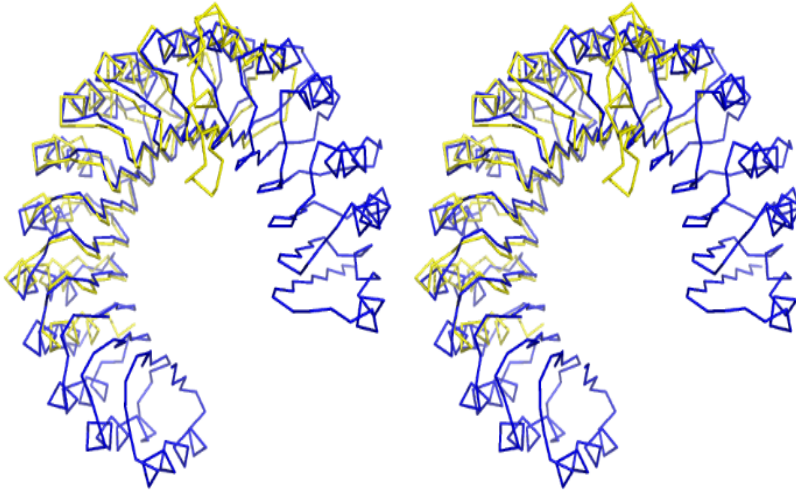

BLUE COLOR - DALI TEMPLATE

YELLOW COLOR-QUERY DOMAIN

DALI TEMPLATE ID - 1z7x-W

DOMAIN LENGTH- 226-477 (251)

DALI TEMPLATE LENGTH- 460

The number of structurally equivalent residues (LALI) - 227 aa

RMSD (DALI) - 2.3

ANNOTATION - **LRR - Ribonuclease Inhibitor**

A leucine-rich repeat (LRR) is a protein structural motif that forms an  $\alpha/\beta$  horseshoe fold. Leucine-rich repeats are frequently involved in the formation of protein-protein interactions. Leucine-rich repeat motifs have been identified in a large number of functionally unrelated proteins. Ribonuclease inhibitors (RI) or Ribonuclease/angiogenin inhibitor are a family of large proteins that bind to and inhibit ribonucleases.

*Supplementary figure 3a : Conserved domain structure of IndInt g22432*

**g22212.t1**

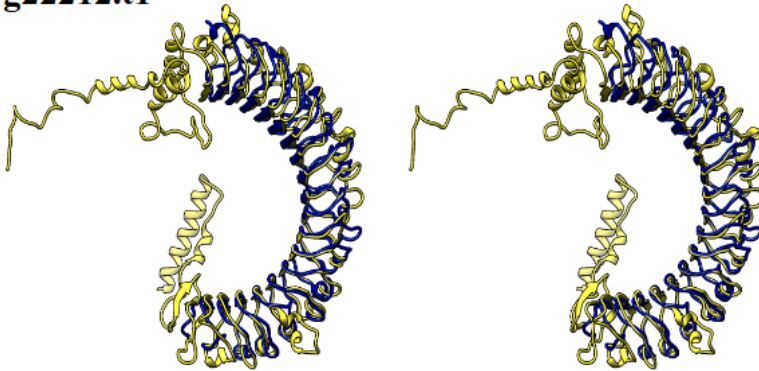

DOMAIN 1 389-1021  
(635 amino acid)

BLUE COLOR - DALI TEMPLATE

YELLOW COLOR-QUERY DOMAIN

DALI TEMPLATE ID - 4li1-B

DOMAIN LENGTH- 635 AA

LALI - 418 AA

DALI TEMPLATE LENGTH- 425

RMSD (DALI) - 2.6

Function :

LEUCINE-RICH REPEAT-  
CONTAINING G-PROTEIN COUPLED

**g22212.t1**

DOMAIN 2 → 435-932  
(497 amino acid)

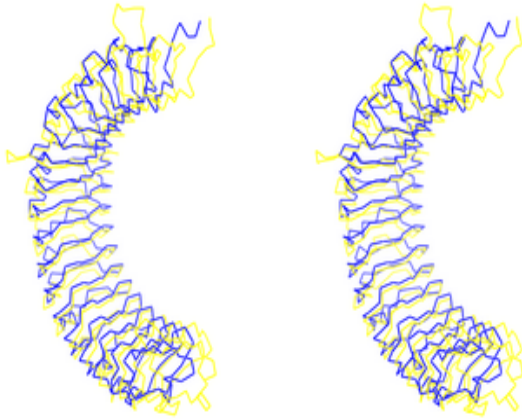

BLUE COLOR - DALI TEMPLATE

YELLOW COLOR-QUERY DOMAIN

DALI TEMPLATE ID - **4li1-B**

DOMAIN LENGTH- **497 AA**

LALI - **414 AA**

DALI TEMPLATE LENGTH- **425**

RMSD (DALI) - **2.5**

Function :

LEUCINE-RICH REPEAT-CONTAINING G-PROTEIN COUPLED

*Supplementary figure 3b : Conserved domain structure of IndInt g22212*

### **g22118.t1**

BLUE COLOR - DALI TEMPLATE

YELLOW COLOR-QUERY DOMAIN

DALI TEMPLATE ID - **1JB4-B**  
DOMAIN LENGTH- 181-347 (167 AA)  
DALI TEMPLATE LENGTH-123 AA

The number of structurally equivalent residues (LALI) - 120 AA

RMSD (DALI) - 2.2

ANNOTATION - **NTF2**

[**NTF2** is a cytosolic protein responsible for nuclear import of Ran, a small Ras-like GTPase involved in a number of critical cellular processes, including cell cycle regulation, chromatin organization during mitosis, reformation of the nuclear envelope following mitosis, and controlling the directionality of nucleocytoplasmic transport]

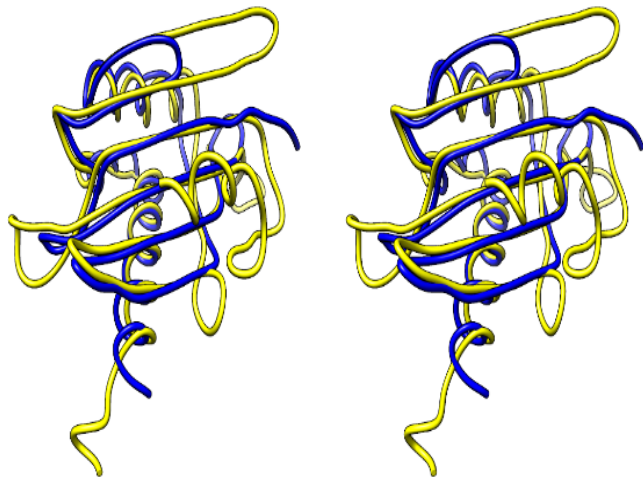

*Supplementary figure 3c : Conserved domain structure of IndInt g22118*

### **g22089.t1**

BLUE COLOR - DALI TEMPLATE

YELLOW COLOR-QUERY DOMAIN

DALI TEMPLATE ID - **5MBX-A**  
DOMAIN LENGTH- 1-508 (508 AA)  
DALI TEMPLATE LENGTH- 472 AA

The number of structurally equivalent residues(LALI)- 433 AA

RMSD (DALI) - 2.4

ANNOTATION-

**PEROXISOMAL**

**N1-(ACETYL)-SPERMINE/SPERMIDINE  
OXIDASE**

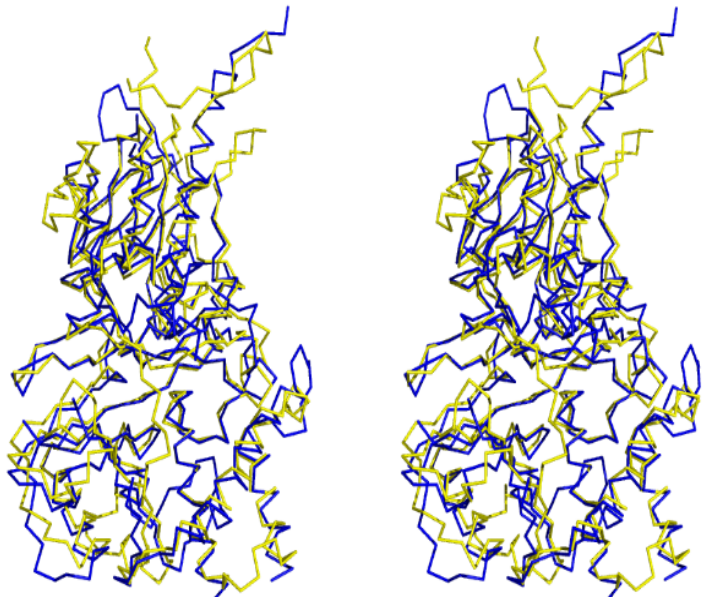

*Supplementary figure 3d : Conserved domain structure of IndInt g22089*

**g22220.t1**  
**(Domain 3)**

BLUE COLOR - DALI TEMPLATE

YELLOW COLOR-QUERY DOMAIN

DALI TEMPLATE ID - **4J19-B**  
DOMAIN LENGTH- 975-1042(68 AA)  
DALI TEMPLATE LENGTH- 76 AA

The number of structurally equivalent residues(LALI) - 65 AA  
RMSD (DALI) - 2.5

ANNOTATION - **HOMEBOX-CONTAINING PROTEIN 1**  
[Binding to double-stranded telomere-associated DNA]

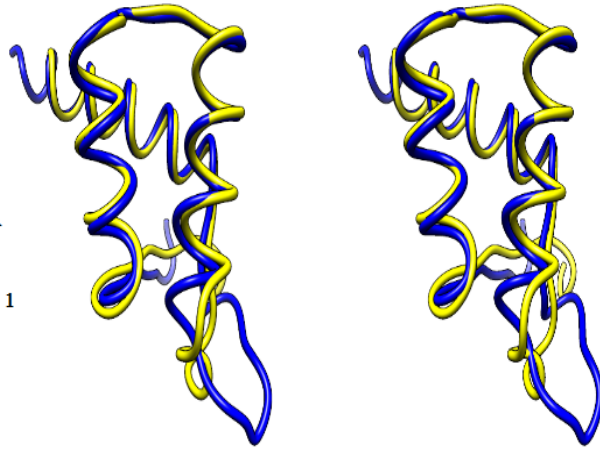

*Supplementary figure 3e : Conserved domain structure of IndInt g22220*

**g22349.t1**

DOMAIN →153-405  
(252 AMINO ACIDS)

BLUE COLOUR →DALI TEMPLATE

YELLOW COLOUR → QUERY DOMAIN

DALI TEMPLATE ID - **3I0P**

DOMAIN LENGTH- 252 AA

LALI - 253 AA

DALI TEMPLATE LENGTH- 361 AA

RMSD (DALI) - 1.7

FUNCTION - MALATE DEHYDROGENASE

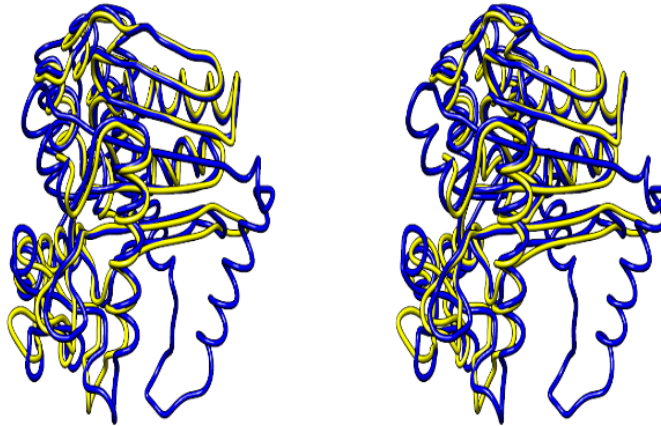

*Supplementary figure 3f : Conserved domain structure of IndInt g22349*



## **g23051.t1**

DOMAIN →189-468  
(279 AMINO ACIDS)

BLUE COLOUR →DALI TEMPLATE

YELLOW COLOUR → QUERY DOMAIN

DALI TEMPLATE ID - 3SZ4

DOMAIN LENGTH- 279 AA

LALI - 180 AA

DALI TEMPLATE LENGTH- 195 AA

RMSD (DALI) - 2.6

FUNCTION - EXONUCLEASE

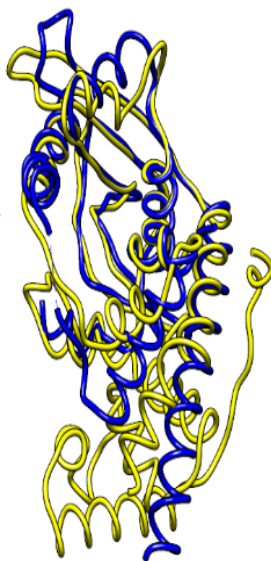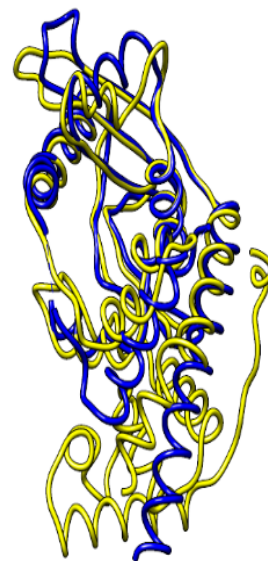

*Supplementary figure 3g : Conserved domain structure of IndInt g23051*

## **g22565.t1**

BLUE COLOR - DALI TEMPLATE

YELLOW COLOR-QUERY  
DOMAIN

DALI TEMPLATE NAME - TUMOR  
NECROSIS FACTOR-INDUCIBLE  
GENE 6 PROTEIN

DALI TEMPLATE ID - 2wno-A

DOMAIN LENGTH - 128 aa

DALI TEMPLATE LENGTH- 119 aa

LALI - 110

RMSD (DALI) - 2.0

Percentage Coverage - 92.4%

Sequence identity - 20%

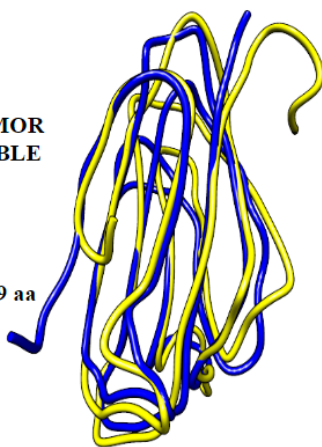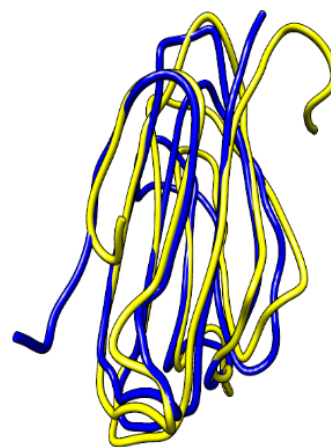

## **g22565.t1**

BLUE COLOR - DALI TEMPLATE

YELLOW COLOR-QUERY  
DOMAIN

DALI TEMPLATE NAME -  
**COMPLEMENT C1R**  
SUBCOMPONENT

DALI TEMPLATE ID - 6f1d-A  
DOMAIN LENGTH - 158  
DALI TEMPLATE LENGTH- 117 aa

LALI - 112

RMSD (DALI) - 2.5

Percentage Coverage ~ 71%  
Sequence identity - 24%

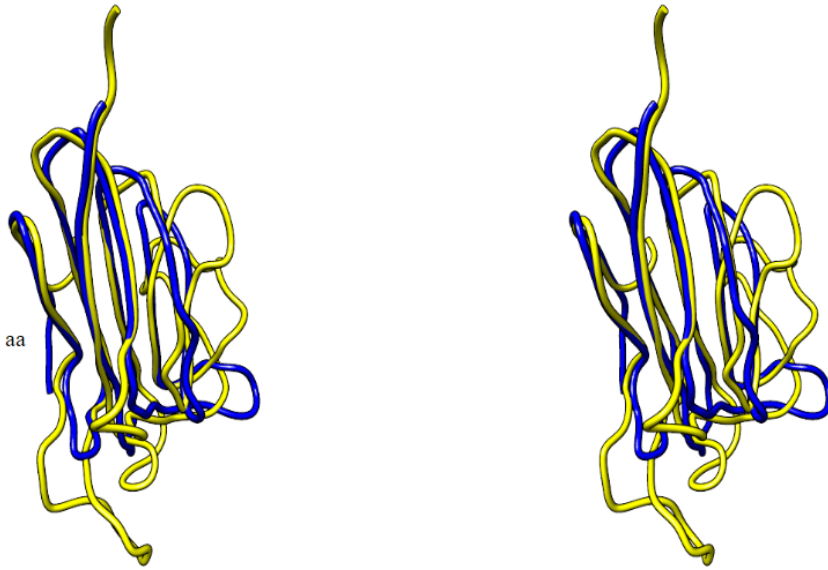

*Supplementary figure 3h : Conserved domain structure of IndInt g22565*

## **g21982.t1**

BLUE COLOR - DALI TEMPLATE

YELLOW COLOR-QUERY DOMAIN  
DALI TEMPLATE NAME -  
**UBIQUITIN**

DALI TEMPLATE ID - 2j7q-A  
DOMAIN LENGTH - 248  
DALI TEMPLATE LENGTH- 232

LALI - 177

RMSD (DALI) - 3.1

Percentage Coverage ~ 71.4%  
Sequence identity - 24%

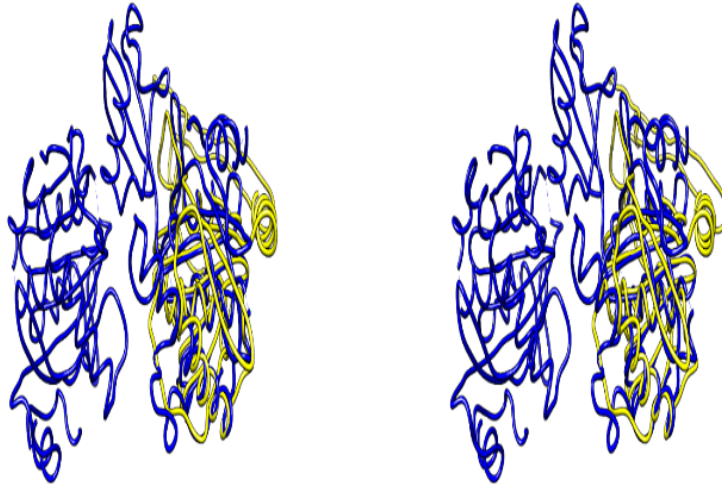

*Supplementary figure 3i : Conserved domain structure of IndInt g21982*

g22147.t1

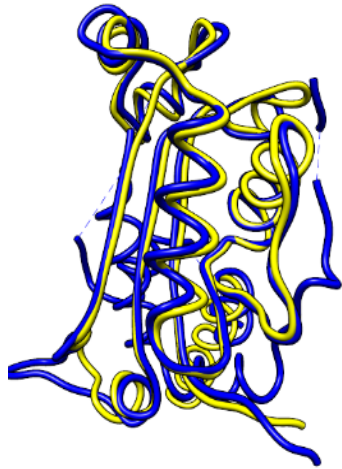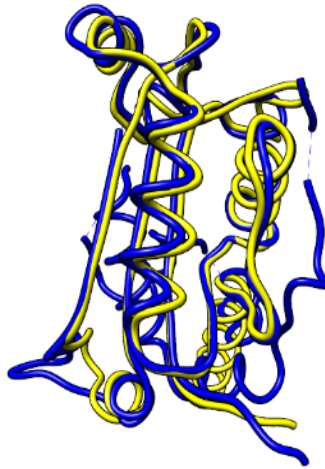

BLUE COLOR - DALI TEMPLATE

YELLOW COLOR-QUERY DOMAIN

DALI TEMPLATE ID - 1y97-B  
DOMAIN LENGTH- 1-156 (156)  
DALI TEMPLATE LENGTH- 211

The number of structurally equivalent residues (LALI) - 145 aa

RMSD (DALI) - 1.4

ANNOTATION - **TREX2**

Exonuclease with a preference for double-stranded DNA with mismatched 3' termini. May play a role in DNA repair. Exonucleolytic cleavage in the 3'- to 5'-direction to yield nucleoside 5'-phosphates.

*Supplementary figure 3j : Conserved domain structure of IndInt g22147*

g22088.t1

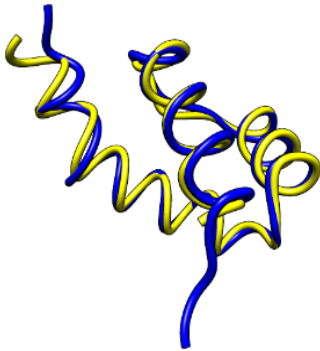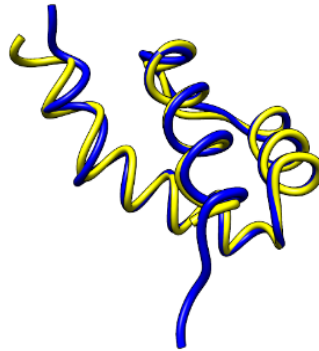

BLUE COLOR - DALI TEMPLATE

YELLOW COLOR-QUERY DOMAIN

DALI TEMPLATE ID - 6FQQ-B  
DOMAIN LENGTH- 240-297 (57)  
DALI TEMPLATE LENGTH- 61

The number of structurally equivalent residues (LALI) - 57 aa

RMSD (DALI) - 1.4

ANNOTATION-**HOMEBOX PROTEIN TGIF1**

A member of the three-amino acid loop extension (TALE) superclass of atypical homeodomains. TALE homeobox proteins are highly conserved transcription regulators. Both TGIF1 and TGIF2 act as transcription factors repressing TGF- $\beta$  signalling.

*Supplementary figure 3k : Conserved domain structure of IndInt g22088*

g22941.t1

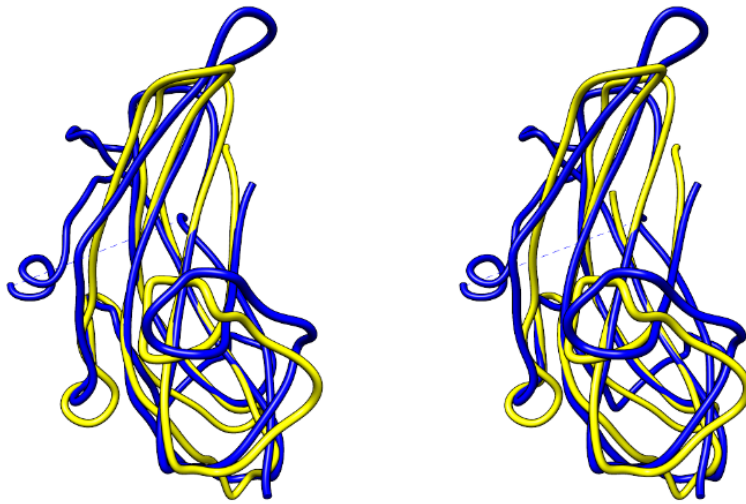

BLUE COLOR - DALI TEMPLATE

YELLOW COLOR-QUERY DOMAIN

DALI TEMPLATE ID - 4ajv-A  
 DOMAIN LENGTH- 404-517 (113)  
 DALI TEMPLATE LENGTH- 152

The number of structurally equivalent residues (LALI) - 106 aa

RMSD (DALI) - 2.1

ANNOTATION - **TRANSFORMING GROWTH FACTOR BETA RECEPTOR TYPE 3**

Transforming growth factor beta (TGFβ) receptors are single pass serine/threonine kinase receptors that belong to TGFβ receptor family. TGFβ is a growth factor and cytokine involved in paracrine signalling and can be found in many different tissue types.

Supplementary figure 3l : Conserved domain structure of IndInt g22941

g22536.t1

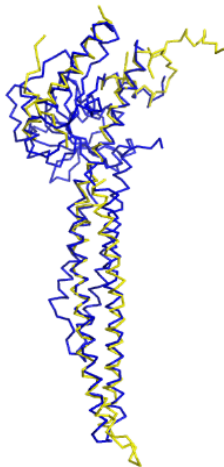

BLUE COLOR - DALI TEMPLATE

YELLOW COLOR-QUERY DOMAIN

DALI TEMPLATE ID - 6jfm-A  
 DOMAIN LENGTH- 1-219 (219)  
 DALI TEMPLATE LENGTH- 422

The number of structurally equivalent residues (LALI) - 121

RMSD (DALI) - 3.1

ANNOTATION - **Mitofusin**

MFN2, an outer mitochondrial membrane GTPase, is critical for mitochondrial fusion, which in turn affects mitochondrial dynamics, distribution, quality control, and function. MFN2 modulates ER-mitochondria tethering.

TMHMM result

```
# seq Length: 239
# seq Number of predicted TMs: 5
# seq Exp number of AA in TMs: 111, 62975
# seq Exp number, first 69 AA: 23, 58, 84
# seq local score of TM1: 0.82884
# seq POSSIBLE N term signal sequence
seq TMHMM:0 inside 1 12
seq TMHMM:0 TMHELX 13 25
seq TMHMM:0 outside 26 40
seq TMHMM:0 TMHELX 45 117
seq TMHMM:0 inside 126 126
seq TMHMM:0 TMHELX 129 153
seq TMHMM:0 outside 157 165
seq TMHMM:0 TMHELX 166 188
seq TMHMM:0 inside 189 191
seq TMHMM:0 TMHELX 225 244
seq TMHMM:0 outside 275 279
```

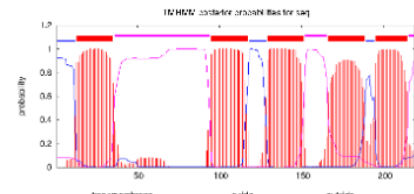

Supplementary figure 3m : Conserved domain structure of IndInt g22536

**G22843**

BLUE COLOR - DALI TEMPLATE  
YELLOW COLOR-QUERY DOMAIN

DALI TEMPLATE ID - 6FP9  
DOMAIN LENGTH- 209 AA  
DALI TEMPLATE LENGTH-171 AA  
The number of structurally equivalent residues (LALI) - 168 AA  
RMSD (Chimera) - 1.897  
ANNOTATION - DARPin

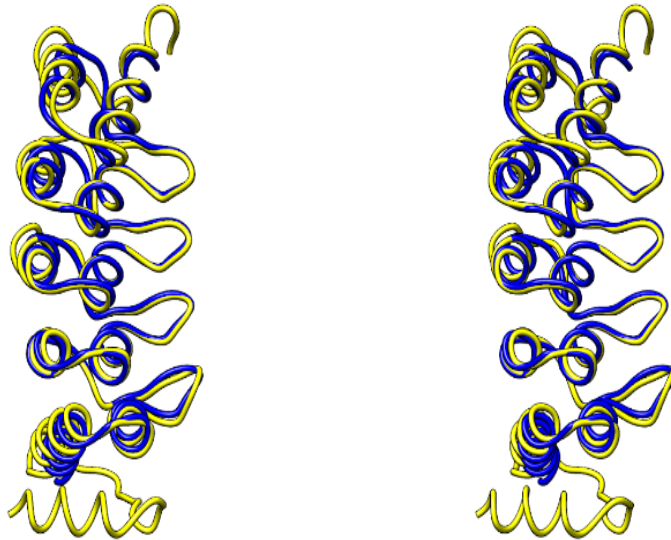

*Supplementary figure 3n : Conserved domain structure of IndInt g22843*

**G22150**

BLUE COLOR - DALI TEMPLATE  
YELLOW COLOR-QUERY DOMAIN

DALI TEMPLATE ID - 5WU1  
DOMAIN LENGTH- 727 AA  
DALI TEMPLATE LENGTH-493 AA  
The number of structurally equivalent residues (LALI) - 353 AA  
RMSD (Chimera) - 2.5

ANNOTATION -

SPECKLE TARGETED  
PIP5K1A-REGULATED POLY(A)  
POLYMERASE.  
Poly(A) polymerase that creates the  
3'-poly(A) tail of specific pre-mRNAs

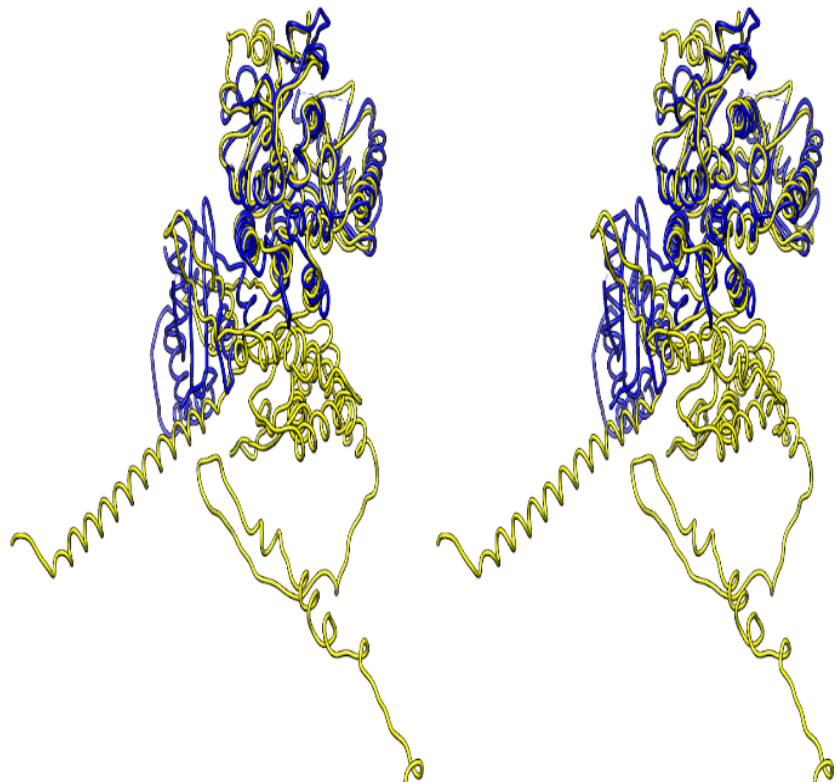

*Supplementary figure 3o : Conserved domain structure of IndInt g22150*

**DOMAINS WHICH DID NOT SUPERIMPOSE  
WELL BUT HAVE A FUNCTIONAL  
ANNOTATION IN DALI**

GENE ID - **g22118.t1**  
DOMAIN LENGTH - 1-109(109 AA)

FIRST HIT DALI TEMPLATE PDB ID - **7K3R-A**  
DALI TEMPLATE LENGTH- **95 AA**

The number of structurally equivalent  
residues(LALI) - **80 AA**

RMSD (DALI) - **3.5**

ANNOTATION - **INTERFERON INDUCIBLE  
PROTEIN AIM2**

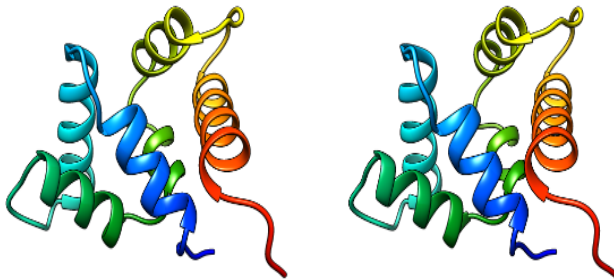

*Supplementary figure 3p : DALI functional annotation of IndInt g22118*

**G22810.t1 (not superimposed well with template)**

DOMAIN 1  
246-561  
(315 amino acid)

DALI TEMPLATE ID - **7lw7-A (only one hit)**

DOMAIN LENGTH- **315 AA**

LALI - **80 AA**

DALI TEMPLATE LENGTH- **277**

RMSD (DALI) - **5.7**

Function :  
**EXONUCLEASE V**  
The Exonuclease V enzyme is an  
ATP-dependent, double-strand DNA  
exonuclease.

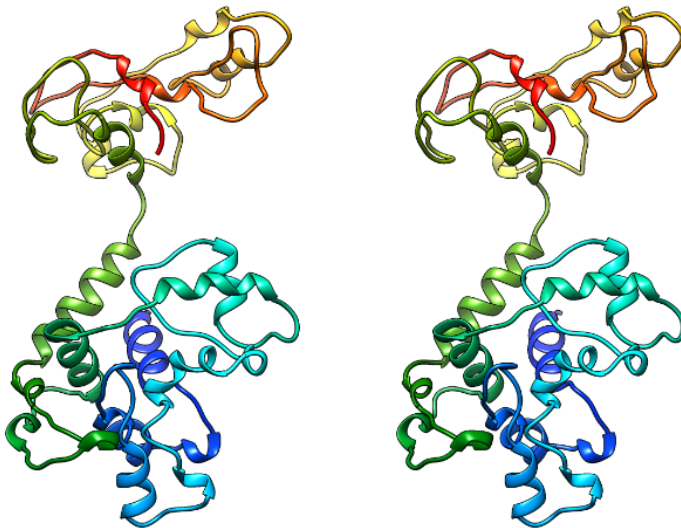

*Supplementary figure 3q : DALI functional annotation of IndInt g22810*

**g22301.t1 (not superimposed well with template)**

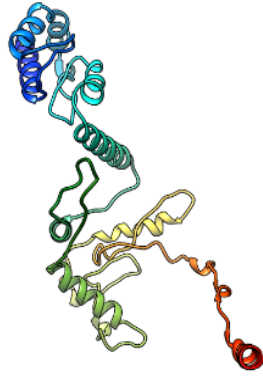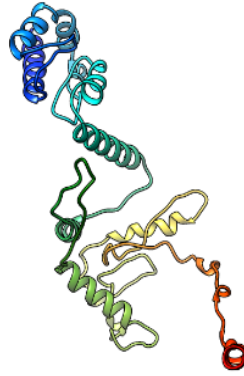

DOMAIN 1  
21-306  
(285 amino acid)

DALI TEMPLATE ID - 2v71-A  
DOMAIN LENGTH- 285 AA

LALI - 156 AA

DALI TEMPLATE LENGTH- 160

RMSD (DALI) - 5.2

Function :  
NUCLEAR DISTRIBUTION PROTEIN  
NUDE-LIKE 1  
It plays a role in multiple processes  
including cytoskeletal organization,  
cell signaling and neuron migration,  
outgrowth and maintenance

*Supplementary figure 3r : DALI functional annotation of IndInt g22301*

**g23001 (not superimposed properly)**

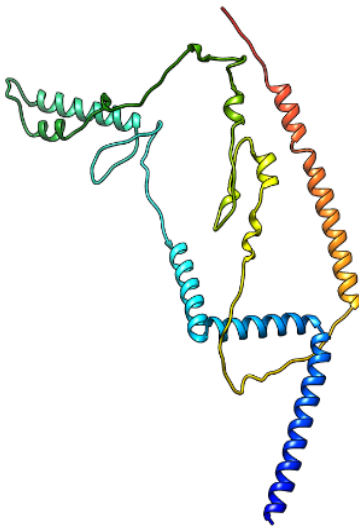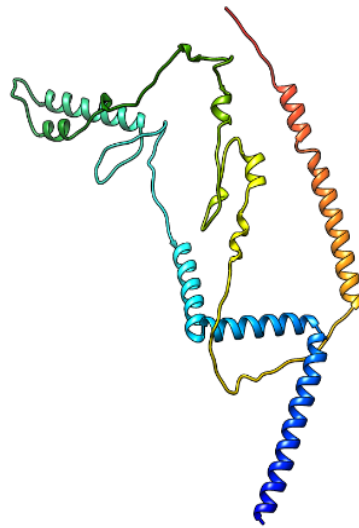

DOMAIN  
115-395  
(280 amino acid)

DALI TEMPLATE ID - 1xpj-D  
DOMAIN LENGTH- 280 AA

LALI - 106 AA

DALI TEMPLATE LENGTH- 123

RMSD (DALI) - 2.6

The Hit template is a  
HYPOTHETICAL  
PROTEIN;

*Supplementary figure 3s : DALI functional annotation of IndInt g23001*

**MODELS WHICH DID NOT FOLD WELL-**

**MODELS WHICH DID NOT FOLD WELL**

**g22846.t1(length - 701 AA)**

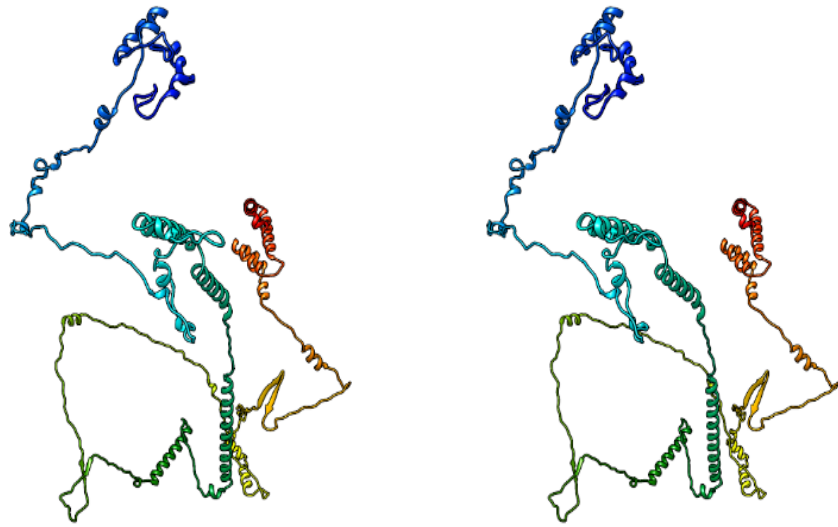

*Supplementary figure 3t : Alpha fold predicted structure of IndInt g22846*

**g22224.t1 (LENGTH - 343 AA)**

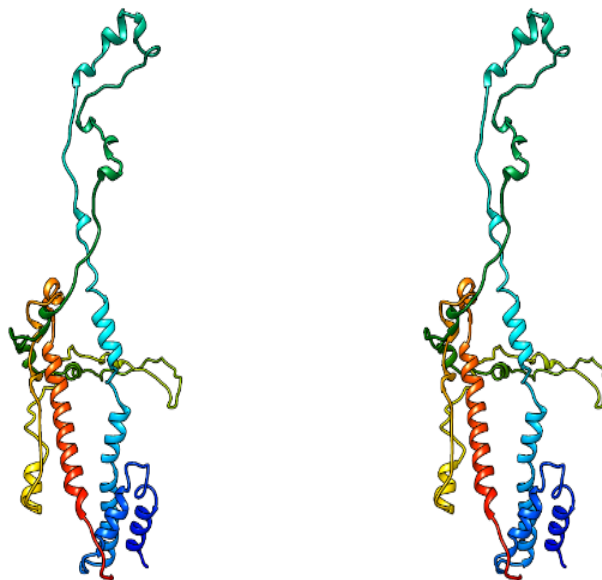

*Supplementary figure 3u : Alpha fold predicted structure of IndInt g22224*



**g22323 450 amino acids - very high error plot**

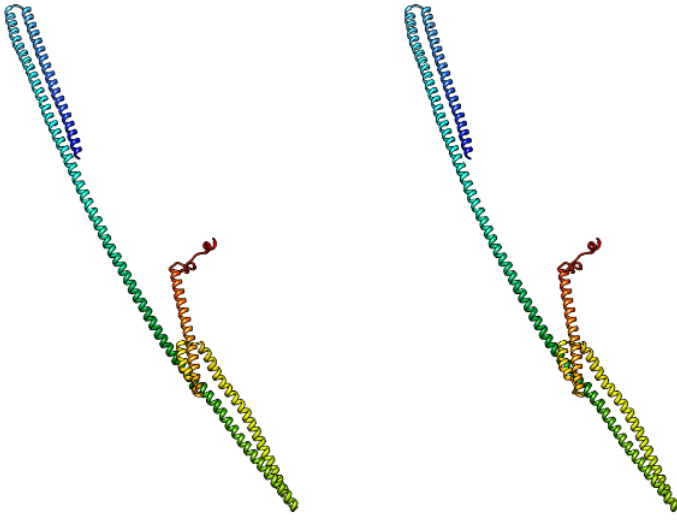

*Supplementary figure 3v : Alpha fold predicted structure of IndInt g22323*

**g21978.t1**

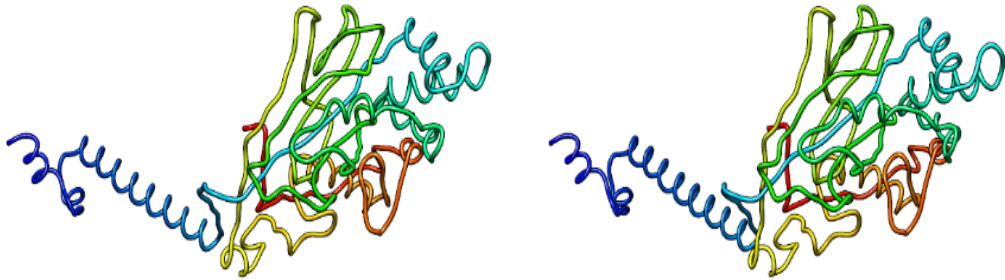

*Supplementary figure 3w : Alpha fold predicted structure of IndInt g21978*

**g22197.t1**

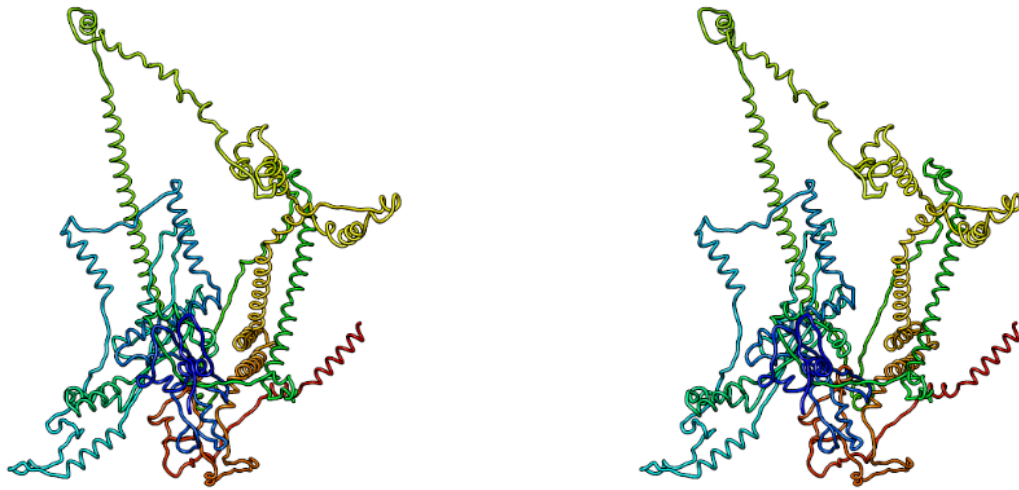

*Supplementary figure 3x : Alpha fold predicted structure of IndInt g22197*

**g22416.t1**

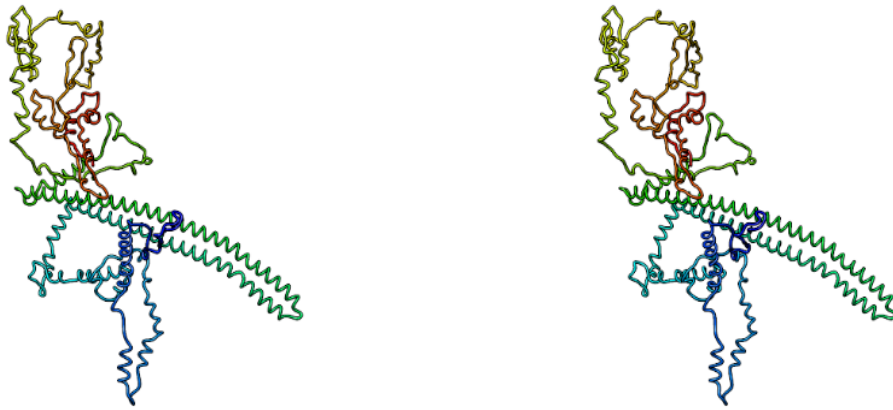

*Supplementary figure 3y : Alpha fold predicted structure of IndInt g22416*

**g22689.t1**

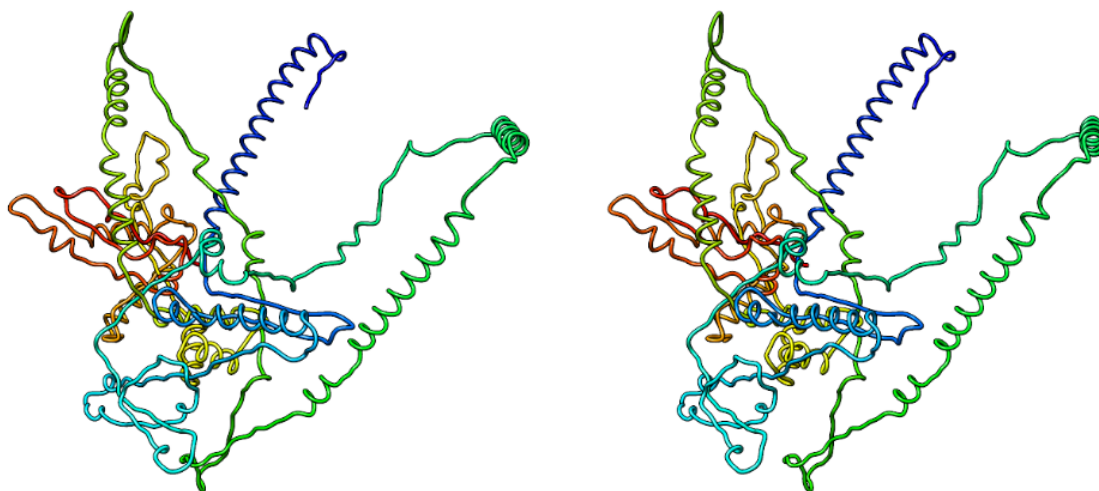

*Supplementary figure 3z : Alpha fold predicted structure of IndInt g22689*

**g21989.t1**

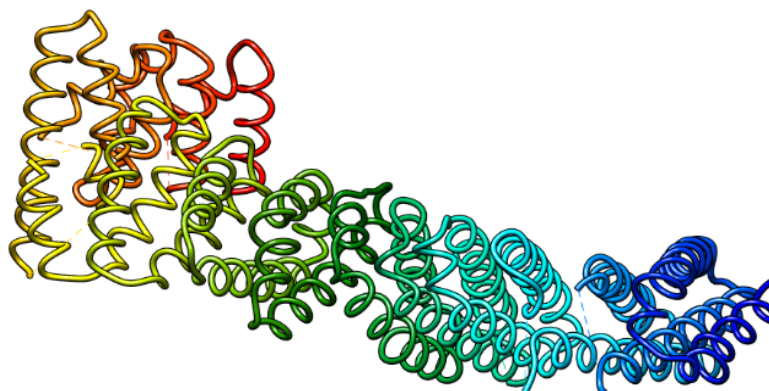

*Supplementary figure 3a1 : Alpha fold predicted structure of IndInt g21989*

**g22713.t1**

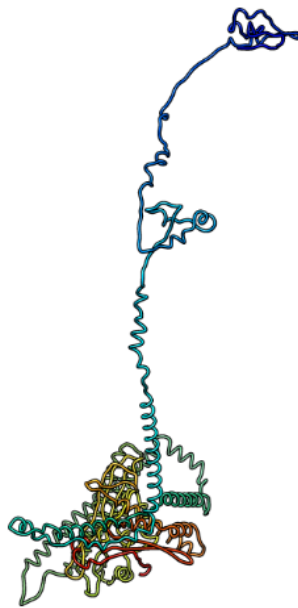

*Supplementary figure 3a2 : Alpha fold predicted structure of IndInt g22713*

**g23157.t1**

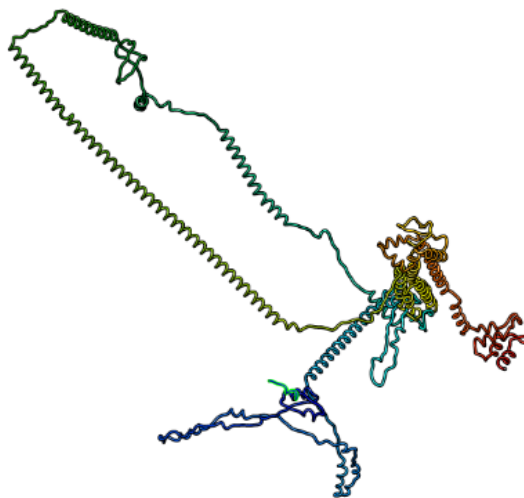

*Supplementary figure 3a3 : Alpha fold predicted structure of IndInt g23157*

**g22302.t1**

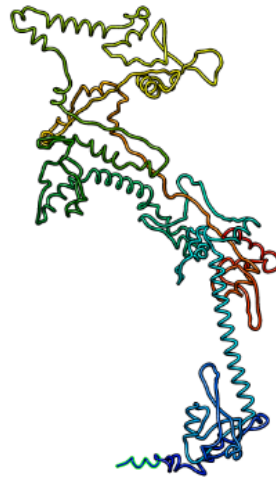

*Supplementary figure 3a4 : Alpha fold predicted structure of IndInt g22302*

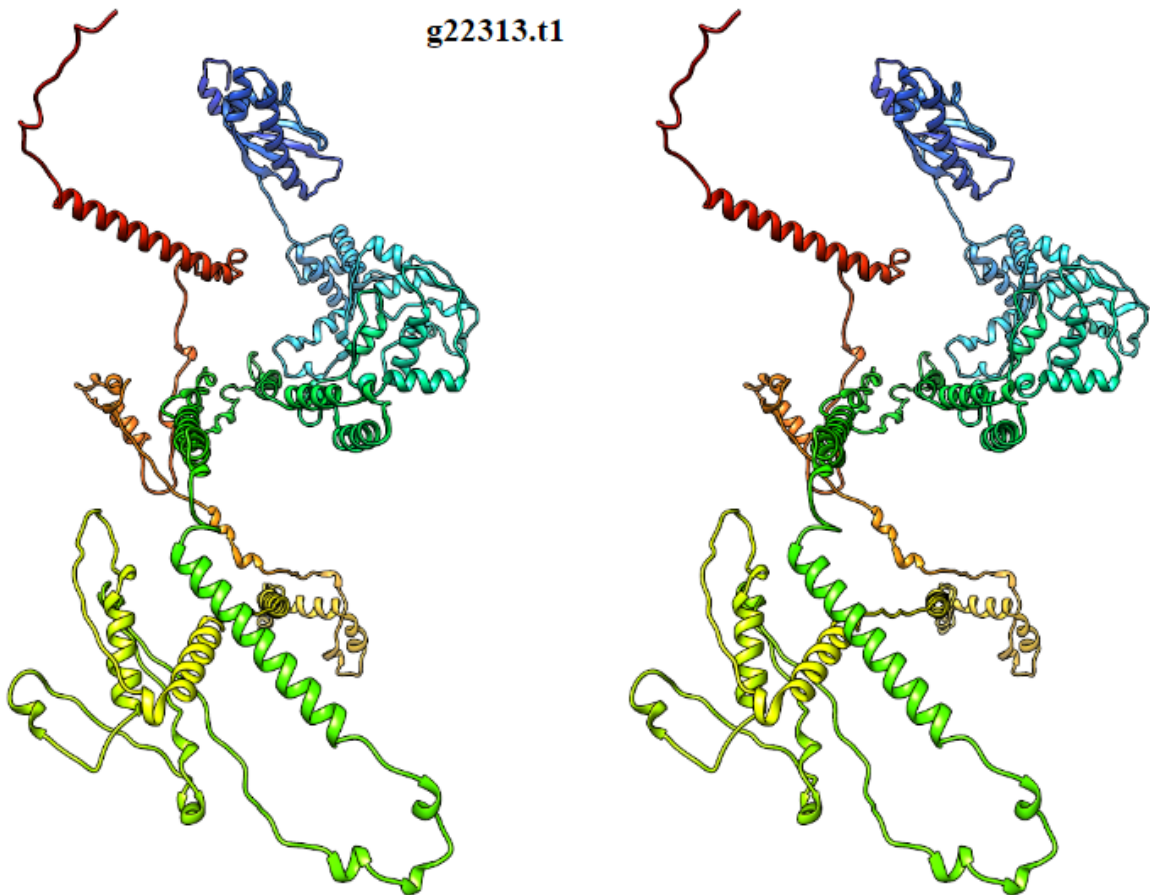

*Supplementary figure 3a5 : Alpha fold predicted structure of IndInt g22313*



```

AnColuzzii_XP040229266          LDKLNL SYNPIGEAGVLILGGAIKGRAQLSELHFTGCPMGVEGSFRVIQLLSFHETLRKV 433
AnArabiensis_XP040157989       LDKLNL SYNPIGEAGVLILGGAIKGRAQLSELHFTGCPMGVEGSFRVIQLLSFHETLRKV 433
AnGambiae_AGAP005805          LDKLNL SYNPIGQAGVLILGGAIKGRAQLSELNFTGCPLGVEGSFRVIQLLSFHETLRKV 433
IndInt_g22432                   VDRDL SYNPIGEAGVLILGGAIKGR TQLSELNFTGCQMGVEGSFRL--LSFHVTLRKV 428
AnStephensi_XP035917226       VDRDL SYNPIGEAGVLILGGAIKGR TQLSELNFTGCQMGVEGSFRVIQLLSFHVTLRKI 478
: * : ***** : ***** : ***** : ***** : ***** : ***** :
AnColuzzii_XP040229266          SLNCVPISPEGGDKLQVLENNRIEEVQVRDCGLTERVRSKIGKILRKNASTRHQSRRS 493
AnArabiensis_XP040157989       SLNCVPISPEGGDKLQVLENNRIEEVQVRDCGLTERVRARIGKILRKNANARHRSRRS 493
AnGambiae_AGAP005805          SLNCVPISPEGGDKLQVLENNRIEEVHVRDCGLTERVVRIGKILRKNANARHRSRRS 493
IndInt_g22432                   SLNCVPISLEGGAKLVQLQENIRIEDVQVRQCGLPDELLVKPHIIFANPDYRASSSGDT 488
AnStephensi_XP035917226       SLNCVPISLEGGAKLVQLQENIRIEDVQVRQCGLPDELLVKVRKILRKNAKIRDQLR-S 537
***** ** * ***** ** * : * : * : * : * : * : * :
AnColuzzii_XP040229266          DGKVATPPMVRSPAT-----MFQLERQVFPVQS----- 521
AnArabiensis_XP040157989       DGKVATPPMVRSPAS-----MFQLERQVFPVQS----- 521
AnGambiae_AGAP005805          AGKVATPPMVRSPAS-----MFQLERQVFPVQS----- 521
IndInt_g22432                   ALLTAPKEIRHCPPVDRQAEPVPGRTIIHYANKSHFPFPVRILVKVLRPVAFIGPRTK 548
AnStephensi_XP035917226       VRMSSEQPMDKCHTSERSLGS-----MFLLERQ-----VFSE----- 569
: : : : : * : :
AnColuzzii_XP040229266          ----- 521
AnArabiensis_XP040157989       ----- 521
AnGambiae_AGAP005805          ----- 521
IndInt_g22432                   CRVAPGPTFASASDSEQTLALWSECNTRADRSSTADRPIRSRSIGGLIVKWECLWHGPEH 608
AnStephensi_XP035917226       ----- 569
AnColuzzii_XP040229266          ----- 521
AnArabiensis_XP040157989       ----- 521
AnGambiae_AGAP005805          ----- 521
IndInt_g22432                   KRMCACASVCLCMWAPRFGRHFDSMTLKTSTGNIIYQTGYRLSGTSGRITSACFTRVHP 668
AnStephensi_XP035917226       ----- 569
AnColuzzii_XP040229266          ----- 521
AnArabiensis_XP040157989       ----- 521
AnGambiae_AGAP005805          ----- 521
IndInt_g22432                   GTICSGFMATGERHHAHIPPTRK 693
AnStephensi_XP035917226       ----- 569

```

Supplementary figure 4a : MSA for IndInt gene g22432.t1 across other Anopheles species shows high conserved homology.

CLUSTAL O(1.2.4) multiple sequence alignment

```

AnColuzzii_XP040230463 ----- 0
AnArabiensis_XP040158968 ----- 0
AnGambiae_AGAP006645 ----- 0
AnStephensi_XP035917013 ----- 0
IndInt_g22212 MRGLTRSVDPARLQDHETERVVCAYGYIGIPDISFWQLVNAPLRESEMASEPYTVPDS 60

AnColuzzii_XP040230463 -----MVSVHTMRCQ 10
AnArabiensis_XP040158968 -----MVSVHTMRCQ 10
AnGambiae_AGAP006645 -----MRCQ 4
AnStephensi_XP035917013 -----MSRQ 4
IndInt_g22212 GCMAMHSRKSVEECRVQSRNDGGFSPARMQTPPWYNICSNLTVPLIFFTQQGSIHMSRQ 120
* *

AnColuzzii_XP040230463 YLLVLTVVLCALTVN---SLKPDLPKAKDPLFNKMLAESNKGVDADPRYNKMLPDLEE 67
AnArabiensis_XP040158968 YLLVLTVVLCALTVN---SLKPDLPKAKDPLFNKMLAESSTKGVQDPRYNKMLPDLEE 67
AnGambiae_AGAP006645 YLLVLTVVLCALTVN---SLKPDLPKAKDPLFNKMLAESSTKGVDAQDPRYNKMLPDLEE 61
AnStephensi_XP035917013 YLLVLAVALCALAVHSSPALKPDLPKADPLYNKILAETTRSVMDAHRHYNKMLPQPDE 64
IndInt_g22212 YLLVLAVALCALAVNSSPALKPDLPKADPLYNKILAETTRSVMDAHRHYNKMLPQPDE 180
*****.*.....* :*****.*.....* :*:* :*****:*

AnColuzzii_XP040230463 NLIDDDDDDDEEEEDDV---APPTKKAADLNPMYALRGKQ-VKPEVSTVGSVAINKVK 122
AnArabiensis_XP040158968 NLIDDDDDDDEEEEDDV---APPTKKAADLNPMYALRGKQ-VKPEVSTVGSVAINKVK 122
AnGambiae_AGAP006645 NLIDDDDDDDEEEEDDV---APPTKKAADLNPMYALRGKQ-VKPEVSTVGSVAINKVK 116
AnStephensi_XP035917013 NLINSDISEDEDGEDDAMANDDILPKKAADLNPMYAQRGKQPAKPEVSTVGSVAINKVK 124
IndInt_g22212 NLINSDISEDEDADDDEAMANDDILPKKAADLNPMYAQRGKQPAKPEVSTVGSVAINKVK 240
*****.* :*:* :*:* :*****.*

AnColuzzii_XP040230463 INEDIDSYEEVLLKGNKGSV-----KPSKSTTAKPVAKPATEDNYDEYDDD 168
AnArabiensis_XP040158968 INEDIDSYEEVLLKGNKGSV-----KPSKSTTAKPVAKPATEDNYDEYDDD 168
AnGambiae_AGAP006645 INEDIDSYEEVLLKGNKGSVDIDDSYQVEDLSGEEKPSKSTTAKPVAKPATEDNYDEYDDD 176
AnStephensi_XP035917013 INEDIDSYEEVLLKGNKGSV-----KPSKPTTSKPAAKTEGED--DE-YDD 167
IndInt_g22212 INEDIDSYEEVLLKGNKGSV-----KPSKPTTSKPAAKTEGED--DE-YDD 283
*****.* :*:* :*:* :*****.*

AnColuzzii_XP040230463 ESDEQIDFSGVQKVLAKPLKQVPAEKSAKPAVPSTTAKPKAVTTGKQNVIELDQYDDDA 228
AnArabiensis_XP040158968 ESDEQIDFSGVQKVLAKPLKQVPAEKSAKPAVPSTTAKPKAVTTGKQNVIELDQYDDDA 228
AnGambiae_AGAP006645 ESDEQIDFSGVQKVLAKPLKQVPAEKSAKPAVPSTTAKPKAVTTGKQNVIELDQYDDDA 236
AnStephensi_XP035917013 ESDEKIDFSGVQKVLAKPLKQVPAEKSVKTSPPSTTLKPKSTTTGKQNVIELDQYDEDA 226
IndInt_g22212 ESDEKIDFSGVQKVLAKPLKQVPAEKSVKTSPPNTTLKPKSTTTGKQNVIELDQYDDDA 342
*****.* :*:* :*:* :*****.*

AnColuzzii_XP040230463 DM DYQYNYDDDEDNDDDDDEDDDDDEEEDAETLPAQKITNKVNKEVAKKQTNPVKTKDQ 288
AnArabiensis_XP040158968 DM DYQYNYDDDEDNDDDDDEDDDDDEEEDAETLPAQKITNKVNKEVAKKQTNPVKTKDQ 288
AnGambiae_AGAP006645 DM DYQYNYDDDEDNDDDDDEDDDDDEEEDAETLPAQKITNKVNKEVAKKQTNPVKTKDQ 296
AnStephensi_XP035917013 DM DYQYTYDDDEDNDDDDDEDDDD- DDEDAAEELPPQKAGKNVNSE- AKKQTKPVKKTKEQ 284
IndInt_g22212 DM DYQYTYDDDEDNDDDDDEDDDD- DDEDAAEELPPQKAGKNVNSE- AKKQTKPVKKTKEQ 400
*****.* :*:* :*:* :*****.*

```



|                          |                                                               |     |
|--------------------------|---------------------------------------------------------------|-----|
| AnColuzzii_XP040230463   | NKAAGKDNAEDYYDDDEYDD--DDNAEPSNSSYCPRGICERNMHAYMVATCSRLDLETQ   | 346 |
| AnArabiensis_XP040158968 | NKAAGKDNAEDYYDDDEYDD--DDNAEPSNSSYCPRGICERNMHAYMVATCSRLDLETQ   | 346 |
| AnGambiae_AGAP006645     | NKAAGKDNAEDYYDDDEYDD--DDNAEPSNSSYCPRGICERNMHAYMVATCSRLDLETQ   | 354 |
| AnStephensi_XP035917013  | NKTAAGKGTDESYYYDDEDDDDDDYNVDSSNSTYCPRGICERNMHSYMVATCSRLDLETQ  | 344 |
| IndInt_g22212            | NKTAAGKSTDESYYYDDEDDDDDDYNVDSSNSTYCPRGICERNMHSYMVATCSRLDLETQ  | 460 |
|                          | ***:*. *.. *.* ** ** * *.: **.*:*****.*****                   |     |
| AnColuzzii_XP040230463   | KFTSHITDLQVLDVGPKYPIELGPEFFKKIGLSHVVISIKITNCTIVYISPOAFAGLDLEY | 406 |
| AnArabiensis_XP040158968 | KFTSHITDLQVLDVGPKYPIELGPEFFKKIGLSHVVISIKITNCTIVYISPOAFAGLDLEY | 406 |
| AnGambiae_AGAP006645     | KFTSHITDLQVLDVGPKYPIELGPEFFKKIGLSHVVISIKITNCTIVYISPOAFAGLDLEY | 414 |
| AnStephensi_XP035917013  | KFTSAITDLQVLDVGPKYPIELGPEFFKKIGLSHVVISIKITNCTIVYISPOAFAGLDVLY | 404 |
| IndInt_g22212            | KFTSAITDLQVLDVGPKYPIELGPEFFKKIGLSHVVISIKITNCTIVYISPOAFAGLDVLY | 520 |
|                          | ****.*****.*****                                              |     |
| AnColuzzii_XP040230463   | SVNLTNSGIDIIHPDTFANNTKLRLLTSLSGNDLSAMQSVNHNTPYMDYMLKAPTVEELDI | 466 |
| AnArabiensis_XP040158968 | SVNLTNSGIDIIHPDTFANNTKLRLLTSLSGNDLSAMQSVNHNTPYMDYMLKAPTVEELDI | 466 |
| AnGambiae_AGAP006645     | SVNLTNSGIDIIHPDTFANNTKLRLLTSLSGNDLSAMQSVNHNTPYMDYMLKAPTVEELDI | 474 |
| AnStephensi_XP035917013  | SVNLTNSGIDIMHPDTFANNTKLRLLTSLSGNDLSAMQSVNHNTPYMDYMLKAPTVEELDI | 464 |
| IndInt_g22212            | SVNLTNSGIDIMHPDTFANNTKLRLLTSLSGNDLSAMQSVNHNTPYMDYMLKAPTVEELDI | 580 |
|                          | *****.*****.*****                                             |     |
| AnColuzzii_XP040230463   | SRCKLQELQPNAFNELKNIYINLSENNLSNLPEGIFDNVETIEELDLSMNNIVELPKNI   | 526 |
| AnArabiensis_XP040158968 | SRCKLQELQPNAFNELKNIYINLSENNLSNLPEGIFDNVETIEELDLSMNNIVELPKNI   | 526 |
| AnGambiae_AGAP006645     | SRCKLQELQPNAFNELKNIYINLSENNLSNLPEGIFDNVETIEELDLSMNNIVELPKNI   | 534 |
| AnStephensi_XP035917013  | SRCKLQELQPNAFNELKNIYINLSENNLSNLPEGIFDNVETIEELDLSANNIAELPKNI   | 524 |
| IndInt_g22212            | SRCKLQELQPNAFNELKNIYINLSENNLSNLPEGIFDNVETIEELDLSANNIAELPKNI   | 640 |
|                          | *****.*****.*****                                             |     |
| AnColuzzii_XP040230463   | FAKTSLAILHLKHNKITNNVDFVTADLQKLDLSFCQIRTVHNTMFKGMDGLTNLILKGNH  | 586 |
| AnArabiensis_XP040158968 | FAKTSLAILHLKHNKITNNVDFVTADLQKLDLSFCQIRTVHNTMFKGMDGLTNLILKGNH  | 586 |
| AnGambiae_AGAP006645     | FAKTSLAILHLKHNKITNNVDFVTADLQKLDLSFCQIRTVHNTMFKGMDGLTNLILKGNH  | 594 |
| AnStephensi_XP035917013  | FAKTSLAILHLKHNKISNNVDFVTADLQKLDVDFCQIRTVHNTMFKGMEGLTNLILKGNH  | 584 |
| IndInt_g22212            | FAKTSLAILHLKHNKISNNVDFVTADLQKLDVDFCQIRTVHNTMFKGMEGLTNLILKGNH  | 700 |
|                          | *****.*****.*****                                             |     |
| AnColuzzii_XP040230463   | IEKIKPMAFISLKNLRQIDLSYNNLEQISAQTFIGNKMLDIIRLNNNPRKRLPNEGFEI   | 646 |
| AnArabiensis_XP040158968 | IEKIKPMAFISLKNLRQIDLSYNNLEQISAQTFIGNKMLDIIRLNNNPRKRLPNEGFEI   | 646 |
| AnGambiae_AGAP006645     | IEKIKPMAFISLKNLRQIDLSYNNLEQISAQTFIGNKMLDIIRLNNNPRKRLPNEGFEI   | 654 |
| AnStephensi_XP035917013  | IEKIKPMAFISLSSLRQIDLSYNNLEQISAQTFIGNKMLDIIRMMNNPRKRLPNEGFEI   | 644 |
| IndInt_g22212            | IEKIKPMAFISLSSLRQIDLSYNNLEQISAQTFIGNKMLDIIRMMNNPRKRLPNEGFEI   | 760 |
|                          | *****.*****.*****                                             |     |
| AnColuzzii_XP040230463   | SFNGFTVYFMDVSNCDISELADNTFKTMPHLTRLNLAWNNLQIRSTYFAHLNKLMDLD    | 706 |
| AnArabiensis_XP040158968 | SFNGFTVYFMDVSNCDISELADNTFKTMPHLTRLNLAWNNLQIRSTYFAHLNKLMDLD    | 706 |
| AnGambiae_AGAP006645     | SFNGFTVYFMDVSNCDISELADNTFKTMPHLTRLNLAWNNLQIRSTYFAHLNKLMDLD    | 714 |
| AnStephensi_XP035917013  | SYNGTFNVYLMDISNCDISELADNTFKTMPQLTRLNLAWNNLQIRPPVMAHLSKLMDD    | 704 |
| IndInt_g22212            | SYNGTFNVYLMDISNCDISELADNTFKTMPQLTRLNLAWNNLQIRPPVMAHLSKLMDD    | 820 |
|                          | *:***. *.*:*****.*****.*****                                  |     |

|                          |                                                                |      |
|--------------------------|----------------------------------------------------------------|------|
| AnColuzzii_XP040230463   | LSNNMIINMDEKTFQNNRNLNLTNLAGNQIATLTSKLFHPLQYLSELDVSDCDLRTIWD    | 766  |
| AnArabiensis_XP040158968 | LSNNMIINMDEKTFQNNRNLNLTNLAGNQIATLTSKLFHPLQYLSELDVSDCDLRTIWD    | 766  |
| AnGambiae_AGAP006645     | LSNNMIINMDEKTFQNNRNLNLTNLAGNQIATLTSKLFHPLQYLSELDVSDCDLRTIWD    | 774  |
| AnStephensi_XP035917013  | LSNNMITELDEKTFQNNRNLNLTNLAGNQIATLTSKLFHPLQYLSELDVSDCDLRTIWD    | 764  |
| IndInt_g22212            | LSNNMITELDEKTFQNNRNLNLTNLAGNQIATLTSKLFHPLQYLSELDVSDCDLRTIWD    | 880  |
|                          | ***** :*****:***:***:***:*****:*****:*                         |      |
| AnColuzzii_XP040230463   | SAAGTKREEVLPNPKRLNVSYNEIMEVFVSDLESMGKLRVLDIRNNTLTCNERLPTLIDW   | 826  |
| AnArabiensis_XP040158968 | SAAGTKREEVLPNPKRLNVSYNEIMEVFVSDLESMGKLRVLDIRNNTLTCNERLPTLIDW   | 826  |
| AnGambiae_AGAP006645     | SAAGTKREEVLPNPKRLNVSYNEIMEVFVSDLESMGKLRVLDIRNNTLTCNERLPTLIDW   | 834  |
| AnStephensi_XP035917013  | SAVKAKREEVLPNPKRLNASYNEISEVFVSDLASMAKLRVLDIRNNSLSCNGRFPRTLIDW  | 824  |
| IndInt_g22212            | SAVKTKREEVLPNPKRLNASYNEISEVFVSDLASMAKLRVLDIRNNSLSCNGRFPRTLIDW  | 940  |
|                          | ** :*****:***** ** :*****:*****:*****                          |      |
| AnColuzzii_XP040230463   | LQKKQISMGLGDTHDHTHAEMTTELRTDNSATLKQWGFQFAWEICQGGGSDSPNQRTYS    | 886  |
| AnArabiensis_XP040158968 | LQKKQISMGLGDTHDHTHAEMTTELRTDNSATLKQWGFQFAWEICQGGGSDSPNQRTYS    | 886  |
| AnGambiae_AGAP006645     | LQKKQISMGLGDTHDHTHAEMTTELRTDNSATLKQWGFQFAWEICQGGGSDSPNQRTYS    | 894  |
| AnStephensi_XP035917013  | LQKKQISMAD-NSHDHTHAEMN-VLRTDNSVSLKQWGFQFAWEICQGGSG-DPNTLSYS    | 881  |
| IndInt_g22212            | LQKKQISMGD-NSHDHTHAEMN-VLRTDNSVSLKQWGFQFAWEICQGGSG-DPNTLSYS    | 997  |
|                          | **.***.* :*****:*****.*****:*****:*****:*****                  |      |
| AnColuzzii_XP040230463   | ESDEEYNIIEDEDDVSEAADADVMAEAKNAKSNKIVDSKNELDDYSDDSVSDSSEDEDSA   | 946  |
| AnArabiensis_XP040158968 | ESDEEYNIIEDEDDVSEAADADVMAEAKNAKSNKIVDSKNELDDYSDDSVSDSSEDEDSA   | 946  |
| AnGambiae_AGAP006645     | ESDEEYNIIEDEDDVDAADADVMAEAKNAKSNKIVDSKNELDEYSDSVSDSSEDEDSA     | 954  |
| AnStephensi_XP035917013  | ETEEDYDEDEDDSED-ADAEV-TADTNAKSNKIVDSKNELDEYSDSETADSDSDNDNAD    | 939  |
| IndInt_g22212            | ETEEDYDEDEDDSED-ADAEV-TAGTNAKSNKIVDSKNELDEYSDSETADS--DDNDNAD   | 1053 |
|                          | ***.*:***:***:*****:*****:*****:*****:***:***:***:***          |      |
| AnColuzzii_XP040230463   | --DEDD--EEDDEEDDDDDDDDEEEQERENILDAANGIQKIEQGILTGKQADED--DDG    | 999  |
| AnArabiensis_XP040158968 | --DEDD--EEDDEEDDDDDDDDEEEQERENILDAANGIQKIEQGILTGKQADED--DDG    | 999  |
| AnGambiae_AGAP006645     | --DEDD--EEDDEEDDDDDDDDEEEQERENILDAANGIQKIEQGILTGKQADED--DDG    | 1007 |
| AnStephensi_XP035917013  | ADSEDEDEDEDADDDDDDEEEEEEDDVQERENILDAANGIQQIEQDILTGKLNNAADDDDD  | 999  |
| IndInt_g22212            | ADSEDEDEDEDADDDDDDEEEEEEDDVQERENILDAANGIQQIEQDILTGKLNNAADDDDD  | 1113 |
|                          | *** * :*****:*****:*****:*****:*****:*****:***:***             |      |
| AnColuzzii_XP040230463   | EYE--DDGASVDDVVILENGSMFAVSSVWIVVACILFGISMLLL VVVKVLT EVMKRRGER | 1057 |
| AnArabiensis_XP040158968 | EYE--DDGASVDDVVILENGSMFAVSSVWIVVACILFGISMLLL VVVKVLT EVMKRRGER | 1057 |
| AnGambiae_AGAP006645     | EYE--DDGASVDDVVILENGSMFAVSSVWIVVACILFGISMLLL VVVKVLT EVMKRRGER | 1065 |
| AnStephensi_XP035917013  | EYEDDSEGTNVDDVVILENASMFALSTVALMVSCIVIGSLIMVLLVAKIVGLIFKRRGER   | 1059 |
| IndInt_g22212            | EYEDDSEGTNVDDVVILENASMFALSTVALMVSCIVIGSLIMVLLVAKIVGLIFKRRGER   | 1173 |
|                          | *** :*:*****:*****:* :*:***:* :*:***:* :*:*****                |      |
| AnColuzzii_XP040230463   | YRQALLASKNSFVYQKLTEDIVPSKVPKIHRYEPINQV                         | 1095 |
| AnArabiensis_XP040158968 | YRQALLASKNSFVYQKLTEDIVPSKVPKIHRYEPINQV                         | 1095 |
| AnGambiae_AGAP006645     | YRQALLASKNSFVYQKLTEDIVPSKVPKIHRYEPINQV                         | 1103 |
| AnStephensi_XP035917013  | YRQALLASKNSFVYQKLTEDIVAPKVPKVHRYEPINQV                         | 1097 |
| IndInt_g22212            | YRQALLASKNSFVYQKLTEDIVAPKVPKVHRYEPINQV                         | 1211 |
|                          | *****:*****:*****                                              |      |

Supplementary figure 4b : MSA for IndInt gene g22212.t1 across other Anopheles species shows high conserved homology.

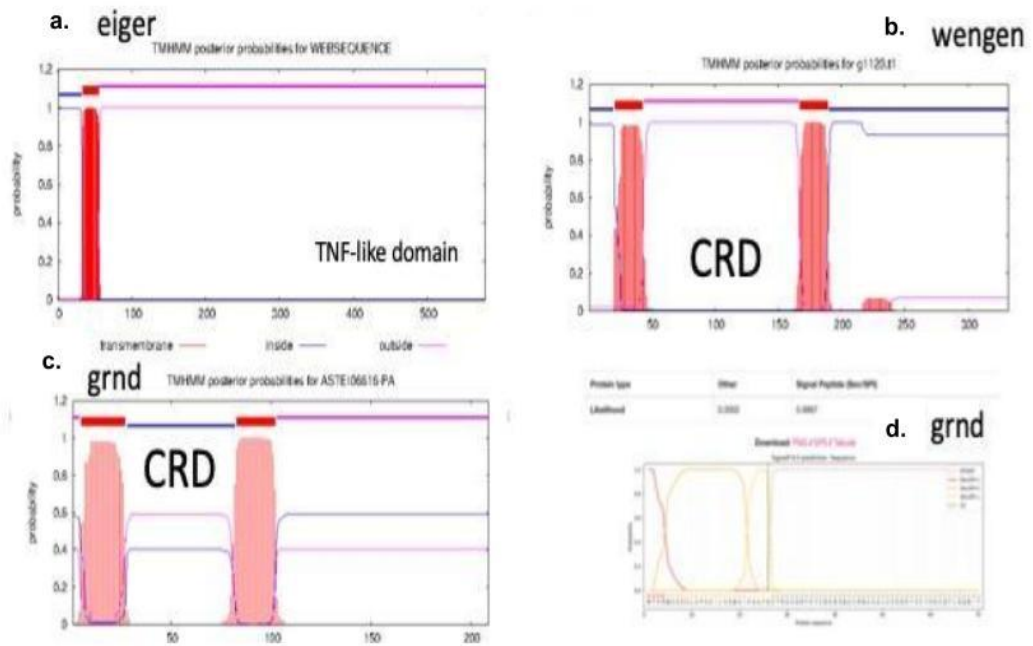

Supplementary figure 5: (a) transmembrane prediction for eiger (b) transmembrane domain prediction for wengen (c) transmembrane prediction of grnd (d) signal peptide prediction for grnd.

## UCI

```
# WEBSEQUENCE Length: 475
# WEBSEQUENCE Number of predicted TMHs: 0
# WEBSEQUENCE Exp number of AAs in TMHs: 0.00271
# WEBSEQUENCE Exp number, first 60 AAs: 0
# WEBSEQUENCE Total prob of N-in: 0.02124
WEBSEQUENCE TMHMM2.0 outside 1 475
```

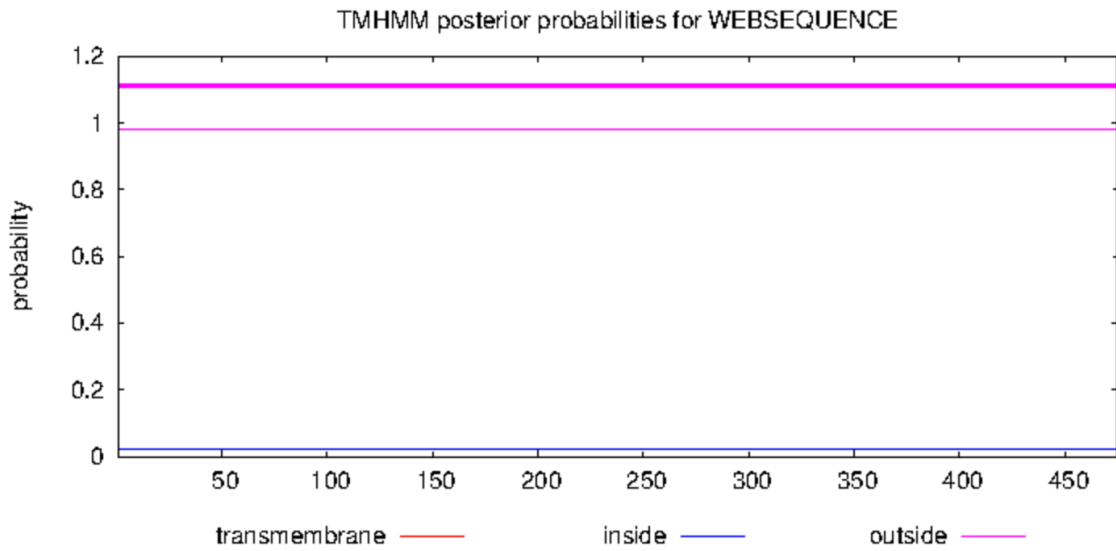

## STE2

```
# WEBSEQUENCE Length: 455
# WEBSEQUENCE Number of predicted TMHs: 0
# WEBSEQUENCE Exp number of AAs in TMHs: 0.00349
# WEBSEQUENCE Exp number, first 60 AAs: 0
# WEBSEQUENCE Total prob of N-in: 0.02710
WEBSEQUENCE TMHMM2.0 outside 1 455
```

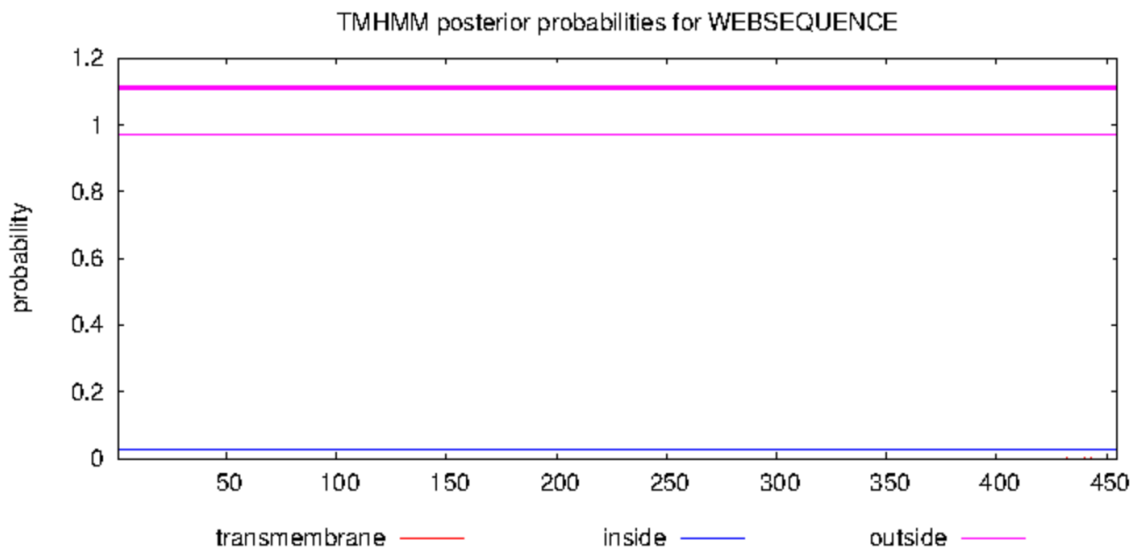

*An. gambiae*:

```
# AGAP006771-PA Length: 544
# AGAP006771-PA Number of predicted TMHs: 1
# AGAP006771-PA Exp number of AAs in TMHs: 22.71772
# AGAP006771-PA Exp number, first 60 AAs: 22.71771
# AGAP006771-PA Total prob of N-in: 0.99203
# AGAP006771-PA POSSIBLE N-term signal sequence
AGAP006771-PA TMHMM2.0 inside 1 32
AGAP006771-PA TMHMM2.0 TMhelix 33 55
AGAP006771-PA TMHMM2.0 outside 56 544
```

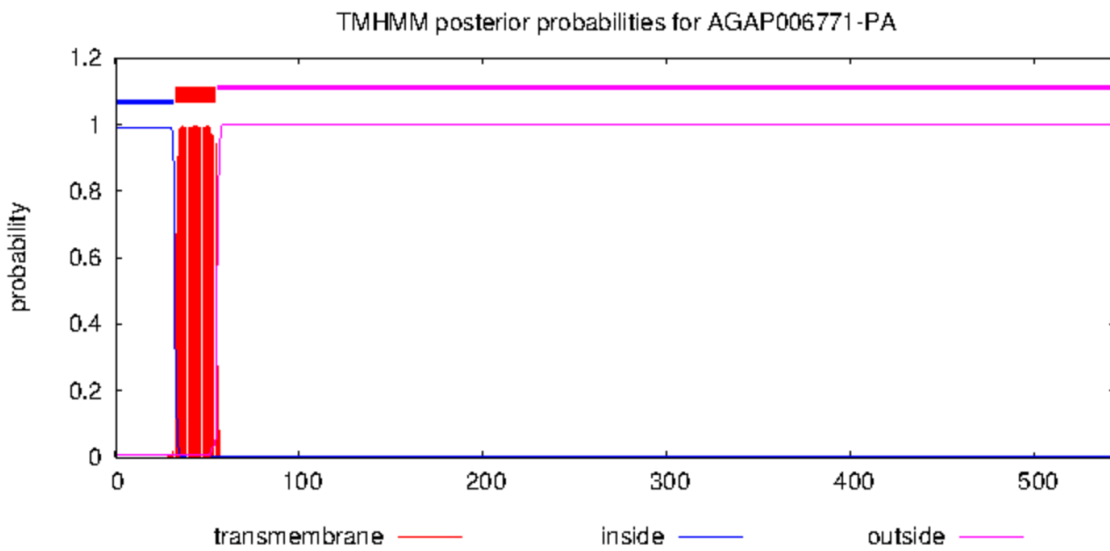

Supplementary figure 6: TmHMM analysis of the *eiger* gene in the UCI and STE2 strains and the *An. gambiae* PEST strain, respectively.

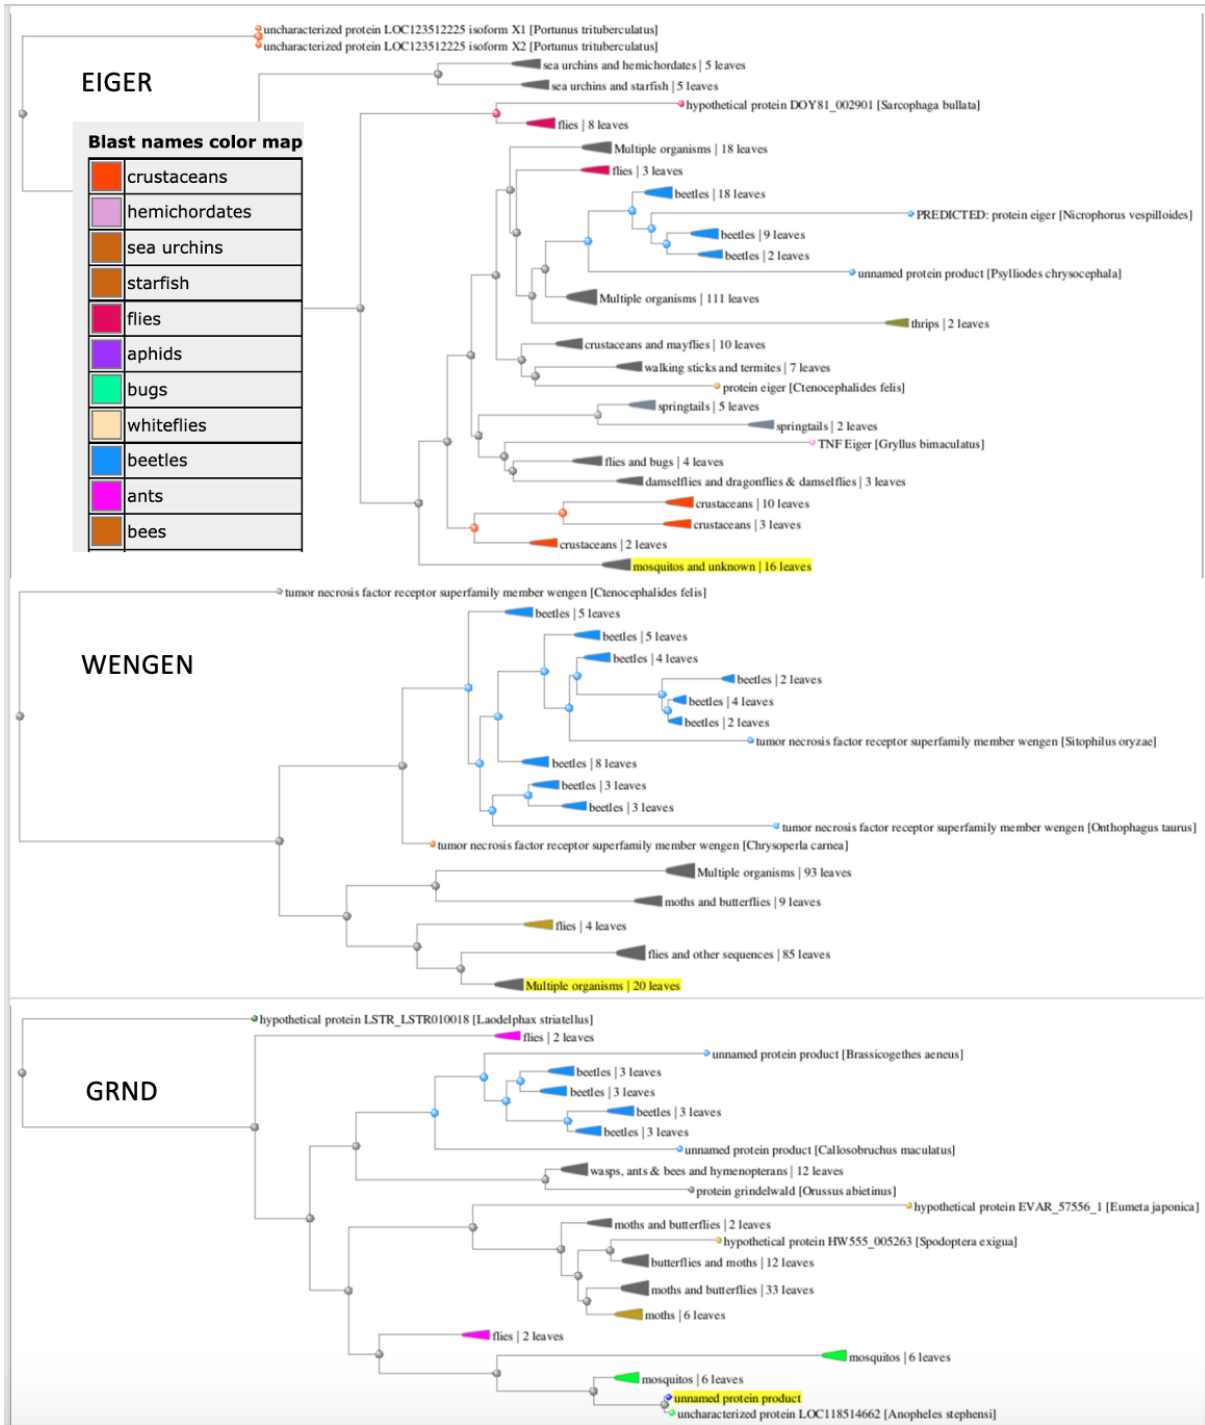

Supplementary figure 7: BLAST result of eiger-wengen-grnd proteins from IndInt against NR-protein database at NCBI suggesting diversity in eiger gene across vectors across arthropods.

\*\*\*\*\*

>ANSTEP-UCI\_TRAN\_00009302-RA protein Name:"Similar to Litaf Lipopolysaccharide-induced tumor necrosis factor-alpha factor homolog (Xenopus tropicalis OX=8364)" AED:0.00 eAED:0.00 QI:437|1|1|1|0|0.33|3|1007|126  
MTKDGPPPYGFVAPPSAPPSYAQAQVGGVPPSSPFTPPQQPVLTSAQIVTTVVPPIGPQSTHMVCPSCH  
SEVVTKTTTTSPGMIAIVVSGFLIALFGCWLGCCLIPCCIDECMDVHHTCPHCKAYLGRHRR

>ANSTEP-UCI\_TRAN\_00010133-RB protein Name:"Similar to Litaf Lipopolysaccharide-induced tumor necrosis factor-alpha factor homolog (Mus musculus OX=10090)" AED:0.14 eAED:0.14 QI:206|1|1|1|0.66|0.5|4|598|158  
MNPSPGKSGSGPEGFQAQPLNQPPYPAQSPPYPGQMPAATGGYPHPSANVFNIAHPPPPPPYDANSNV  
IPPPQNAGTTYVQVVTSPQVGPDPASMVCPSCTKHVITRLDYETSTKTHIAAGLLCLFICWPCFWI  
PYIIDSKNANHYCPNCGAYIGTYRG

>ANSTEP-UCI\_TRAN\_00010132-RB protein Name:"Similar to Litaf Lipopolysaccharide-induced tumor necrosis factor-alpha factor homolog (Mus musculus OX=10090)" AED:0.01 eAED:0.01 QI:206|0.5|0.66|1|1|1|3|787|124  
MDPPPYDQINRPVPAAYPHQQTPTADPFKSASLHTQEPPSLQTTVIVTSPQVGPDPPTTIICPSCRA  
TVVTRLEYETTTHKTHLCAGLLCLFLCWPCAFVVPYCSTACRDANHYCPNCGSFIGTYRK

>ANSTEP-UCI\_TRAN\_00010131-RA protein Name:"Similar to FV3-075L Uncharacterized protein 075L (Frog virus 3 (isolate Goorha) OX=654924)" AED:0.00 eAED:0.00 QI:483|1|1|1|1|1|1|2|936|82  
MTTIIIVTNPQVGPDPMTITCPSCRATVVRTKVKHESTTSTHACALLLWIVCWPCCLCLPYCC  
NSCRDANHYCPRCNTFLGSYKH

*Supplementary text 1: FASTA sequences of the LITAF genes from the UCI strain*

>g6300\_ADAM17\_TACE\_IndInt  
MSLPSIMLTVVLVVSFAVLIVPLQGQLHKNLKYETLHAKDLSHRIEKRGTKHSTHPFNTIKEVEF  
KVLGRKFRLILPHASVLHSNFRAYSVDGNGSESIVHLDRSNFFKGRVFGEMESHVNAHIDDGVM  
ASVVLDPDETYHIEPSWRHLPHLSDKHMIAYRTSDIKFSWDQVDAISGDLGVPRTCGYVKEGLELEG  
QPDDGDEAADGGQAFADGGVDAYENDRDPTPETVWHAEDSQDARKSRRKRQADQYEYTPTKTRCPL  
LLVADYRFFQEMGGSNTKTTINYLVAPPPTGSFGAPFVVPFSNRFLPFYQISLIDRVHKIYNDTI  
WQDRSDQEGFKGMGFVIKKIVVHSEPTRVRGGEAHYNMVREKWDVRNLLLEVFSREYSHKDFCLAHL  
FTDLKFEGGILGLAYVGSPPRNSVGGICTPEYFKNGYTYLNSGLSSSRNHYGQRVITREADLVTA  
HEFGHNWVGSEHDPDIPECSPSASQGGFSLMYTYSVSGYDVNNKFKSPCSLRSIRKVLQAKSGRCFS  
EPEESFCGNLRVEGDEQCDAGLLGTEDNDACCDKNCKLRRNQGAVCSDKNSPCCQNCQYMMAGVKC  
REAYATCEQEARTGNHAECPSPPMSDGTMCQERGCQRNGKCVPYCETQGLQSCMCDIADACK  
RCCRQSINETCFVPEPPDVLDPDGTPCIQGFCKGMCKEKTIQDVVERFWDIIEEININKVLRFLRDN  
IVMAVVMLTALFWIPVSCVIAFYFDRKKRKEWKEYEWSQKLDLIHPSDRRRVIHIRVPRQKITVAR  
M

**>g22826\_Eiger\_IndInt**

MTAETLKPFLNLPNATANDLKAHCAQRSTVVKRGLVALGCILAAALCCGLIGVQIWHLNKTAILQQE  
VDDLKQLYLRAREFTDYEASASARPSSTLITTPDRMIMCADGVRRTPVESQRDLFMMGLVDACKN  
IQTLVSLICPSFDNELFDSPEYVYEPEDLDPDVSDDGHREQETNESGLSSSGMQGDDLELDDSEE  
KENLGIEDLRETNDDDDDDDDDIIIDDRVDIGVPAGGKRRARSISGVTRQGVPIVDEPYVPRNRTR  
HPHRIFEQLRQRPEELVTPPTSAEMFRWDVDSRKTSHTAARHQSYGSISIRPYQHEAHSLSREHHST  
TPMPVAYRSHGGVRRHHSRNElhAGNPTKPPAQILNRMSRVQATGDSMRKQLQQTQRFPKVVGPNPGT  
QKEIVMAPESRVRLRQRKGGAVQPAEPVAKGVHLVELSTMDAVHSDSRVQEWSANDNASKQAIQSS  
SFAFDGERLTVNEPGLYYVYAQVTVSNEFEANGYKVLINGRKHLSCTVNTAQOQGENTNTCFTAGLA  
EIAHAGTTIAVEDVAHGRQHVMYPEKTFFGAFKIGRLAAPTVTTHRRARKVA

**>g1129\_Wengen\_IndInt**

MTHVDPDIRCGMAQVGRRRSHPRRTGRGVIPTTTLVLLAILLQIMDLGDGPGGGRSMLVRAACESRKS  
WWDPTLGECAPLICADHQVLRPCQDYMNVTGTMKDLTASVSRYPHLPPEGNGNGIGSVGRTRA  
HHWKEERRKEGDGVEGYRRVPAISTEEILWDWQVASLLIAIIGCLLFLLAAGCVALNQRSQRWRI  
EKHFDAAQNISKPINNERAPYGILAVGFVVDMEALSAQLVNHLSMQHLESGPILLENFDHGRRLR  
TTGHHPIEVRCVYLDQLLDEKCSQKAHSVQOPTAGNLYIEESIDTPRLQSPIPSARSPPPPISLIR  
HY

**>g18030\_Grnd\_IndInt**

MTVRWTSVLPVVLVAVSIPSAFGCTRKCDRFEYCDENSACRNCALCEKDEYSCYHKCQTLR  
QNIITTLQESVLTMKTIIVLVFSVAVFLICTALALLIKKYVHCIREFCRWRPQNKNTTTTPPVAYTHE  
NPNTKSPKTVPKNGANGPKQTSTSVSIYPETEVDHSVQGTTSISHRYPAEDSTESYSYDNAACNV  
TPTSNNPMPKF

**>g5130\_TRAF2\_IndInt**

MSRPVKREVSAAENCLQSAKVDDDLLEARYECPICSCWLNPEILTKGHRFCRKCITDWLNGKNS  
ICPLDNEPLDIKCDIFPDNCTRREISQIKKPCPNSIRGCVDQFSPTEIDSHLRQCPFAMSRQSQC  
PFARIKCKFIASDEDALNAHIASDCQQHLQLLLETYTGSNDRYKFWDPKNSVPEMSTNELVRS  
YERIVILEQEVHILGIKLSKQELQLTKINQEVDPYSGGVLLWKLEDFSNKIDSMVANSNCMFYSG  
QAYTSPHGYKFCARINVSPTKDSIGLHVHLMQSENDYHLEWPFKGRIKITLLNVRSPELSQHDTI  
MSKPEILAFHRPHQDISPRGFGFLEFAKIKEILAKFADNNTVVLKIQMNIV

**>g13550\_TAB2\_IndInt**

MCSDLGRYDYQFSIRLRVATAKGAAVRTNCGWLREENERTENRESERSDEAEFDDRTVLRCDGEKK  
DDFVSGYQGVWWWFLQTPAIPSTTQSNNTQHYYDEPATAVFTSNSSAATSGSGSNAADSSSILKQR  
ATCACSNISIMQLFHEMKQKYPTVPDTPVSELVTQONCHDRPACIGKLEEAVLGTTPAQTTYPQS  
SGSLKRRSGDRKLAGNRS DGSNSYSSSNSSNSSRESSVDSRLQSASYP TTHQQQQQGVPTTGG  
GTGYSNRFIGESRISSSCANRPTTLAVRPAAAGTGVGNFGATPPPPMPRPNRIAPCPPNVPLG  
TSTITTTTTASSSTELGETVNLQVNVTVSPKAGGPMIAGQRHTSTISLQPEPPYSRELAQVSSTFS  
GGNPLVMGSPTAGTVAGSTPGGSSRTGSASVIGAGGNGGRSSTSVNLTLRQPTDGRPRTPIHIHA  
SPLKYTAKNFNAQSGIQSKLEVTFRDGFSGFSAMRAQVPGYEPQREMMASPOQPEREPCAVALPDG  
HSGWYQSPSSAGSRVPYGGLSGFPPPLSSSSPLPNLAAHQMVSSRGMNGQSLFADGQLENDRLTKE  
MRYQNFVVAEMAVSQQLEQKQRLSLEVERKRTQFESICREIFVLQOPLRFIDAELLDREVLVLAEE  
VEQLQKEVDSCEEEARIQAAAAAATGSSITDGLSALSVEGGSPLMLPPSMVSGASGGGTVVNRP  
PRPPRPPPPRAPTQSPSRGSSGSVTPSTPHLAPSLAVIGGTSSPVPTPTSSVSSSCSTSSSFQSN  
GGVGDPTAPNRLQPSATTGPNQPWTCSLCTFQNHLEMPACEVCSLPKASGSR TAVAAPMTNSNPAF



AVAGDVRDGVGGSPHAAGVLLRRQHHLSDVTGVAAAAAAAAAAAAAAAAAVVGASVAGPSTAPPYPGVA  
EMPPPTFASLTGTSTSMPLQPIPLSHGQQQQQQQQQQQQPTQTVQQSQSNNPPPLQNAQYQK  
SSIEC

**>Intsfg5795\_Hep\_IndInt**

MSDDQSSLSSPATTSSARPFMPLPLELNGERRKPSKKL SFQGCQGGQAPMIPDPTRERIRMQAAA  
GKLQIAPNQTYDFTSDDLDEGEIGRGAFGAVNRMKFTHTGTVMVAVKRIRSTVDEKEQKQLLMDLE  
VVMKSND CNTIVTFYGFALFKEGDCWICMELMDTSLDKFYKFCICECQQSRIPEPILAQITFATVRAL  
NYLKEELNIIHRDVKPSNILLKRNGDIKLCDFGISGQLVDSIARTKDAGCRPYMAPERIDPQRAK  
YDVRSDVWSL GITLMEVATGKFPYKWSVFEQLSQVVEGDPPRLCTTYNGMEFSIDFVNFVNTCL  
IKEERDRPKYGKLLQHAFIQHAEKSDTDVAAYVSEVLES MANNGITQFTTNLPAEGWNESFN

**>g5319\_MKK4\_IndInt**

MSDDQSSLSSPATTSSARPFMPLPLELNGERRKPSKKL SFQGCQGGQAPMIPDPTRERIRMQAAA  
GKLQIAPNQTYDFTSDDLDEGEIGRGAFGAVNRMKFTHTGTVMVAVKRIRSTVDEKEQKQLLMDLE  
VVMKSND CNTIVTFYGFALFKEGDCWICMELMDTSLDKFYKFCICECQQSRIPEPILAQITFATVRAL  
NYLKEELNIIHRDVKPSNILLKRNGDIKLCDFGISGQLVDSIARTKDAGCRPYMAPERIDPQRAK  
YDVRSDVWSL GITLMEVATGKFPYKWSVFEQLSQVVEGDPPRLCTTYNGMEFSIDFVNFVNTCL  
IKEERDRPKYGKLLQHAFIQHAEKSDTDVAAYVSEVLES MANNGITQFTTNLPAEGWNESFN

**>Intsfg11051\_PI3K\_IndInt**

MKQEQTNTTMRKTAHSTLPGNDPSWQVPHRIYLQQQHQQHLHQQQQQQPMQQRPLFDYEFWKNPDE  
LTELHFLMPNGVMITMCIPIHITLLEELKTDVWEEAERYPLYCHLGDKNKYCFSTLASGRNTCNTTH  
ENEATRLMDVQPALGILRFVERTNVSEDTKLMENISILLDSKLPKMTLVNPEVND FRAKMSLLSEE  
IGSRAAMTRMERIAYQYPAKLVSGSHVPDQISRRLANVDGHFCVVAISTDMQVTVKVP CRATPDE  
VLNRILEKKRISMKARMDNSSDFILKVCGR EYIYGAYPMISFQYVQDCLSRDETPTFPRLVRSV  
EVFKNDIYDARDDFTQWSSTATTNTTSSALVSTSSSVSTMSLVSVGKHNSSIAS TGSSSVYSSSS  
QSQQSHTLRKVKYVTSWEVDTKLQCTVQEIRGLNIESDKELGVQLGLFHGGKSLCKTARTRTVTN  
SGKAVWNETICFDINVS NVPRMARLCLVYENMR TTKSTGIRTRTKDGLINPIAWVNTMVF DYKN  
QLKSDSVTLTYTWDYAEDAQSEDI LHPLGTVEPNPNRDNMFMVSM LLSFGPYGPEGRIIVYPGEEEL  
LAHAAKMSHRNEHLNRESAEDTRS IKAIMSAYMYNDRLNDIHEQDRNAIWAKRRECM LQMPQGLPC  
LLYCVEWNNRDEVSEIVSLLQEWPKLLIERALELLDYAYADKYVRRYAVDCLRTIEDDELLLYLLQ  
LVQALKHESYLNCDLVYFLLQRALHNQHIGHYLFWHLRSELSVPSVQVRFGLILEAYLLGSP EHV  
VLLKQMQCLRYLQICSDNVKKSKEKGRALLMEQLAKEGHLTSDLISPLNPSFRCKAVRTERCKVM  
DSKMRPLWIVYENS DPNGDDIHMI FKNGD LRDMLTLQMLRIMDRIWKSHGFDFR MNPYSCISTD  
HKLGLIEVVLNAETIANIQKERGMFSATSPFKKGSLLAWLREHNNTDELLAKAIQEFTLSCAGYCV  
ATYVLGVADRHS DNIMVKKTGQLFHIDFGHILGHFKEKFGFR RERVPFVLTHDFVYVINNGRTDRE  
AQEFCHFQTLCEEAFLILRQHGLILSLFSMMISTGLPELSSEKDLNLYLRETLVLDKTEEEARTH  
KHKFSEALANSWK TSLN WASHNFSKNNRQ

**>g17575\_NIK\_Brun\_IndInt**

MLSQGPDPIMAH PDYEQHHYHHGCLLILVRGIGSSKPRSLQRVFERVQRVNNVKIPADSTGT PRD  
IWVRYIRDHPVENNDWGD FQTHRRLGLITVGKFEAQSELNELCRVHESLKVKYTH TLSRCLLFGP  
STDELQKLN GAAAGTAVAPDGGSKATLEKCFQTPSNFKSRAFFYPENDPCSNLETKISEFITSIYY  
ILELKRMEK TREKLEKAPLLLAPFEKKDFVGLDLESRNNKKRCIGRMTKHLGDLTLQAGLVAESLN  
FFHAASETLRAISDSLWLGAANEGLCAASAILLYPNFRY TMSIQRNSSLQENSSSPQKFNLARNQL  
YTGSYNGADSS TLKHKKSDMVINLSASDTATILGADKTSASSNSSASSISSSLSSGSGSGTASGS  
SSSDSGTLVNRAGSGVAAKFPSNILQPDEITVRYRDAI INYSKYRNAGI IETEAALKAARICIEQG

KNLDVAMFLQNVLYINLNMTEQQRVRRFEVLTDLYQKIGYNRKA AFCORLA AWRHVAQSNSNP DWG  
QSYRLMLESFSGHKLSLEPNEVLENNMGWPVLQIDLLQQLVGTARRLGQSALATRHMTFLLQTMWK  
HLTAQE QREMA LQLQNL SAQCEGAPVPLVLENGI V I P PANLTDLPHCSQLLVKDLAPHLKPVKIVV  
NKVDSGPFLEFTP I HFSSLD RRGIEKDDSKITFNWVQH D VCEVSVSLMNPLPFELQV TDMRLLTTGV  
VFEAF PQTVTLQPNVSTNVSLHGTSIECGELEIQGYSTHTLGVKSNCR LK HMLHRRERHLPPCYKV  
KVIPALPKLETKTSLPQTATFSGMPNADFVTT SASITLYNGERGECTITLTNSSNIPIEYVDATFH  
STLEASLQSRIFQLATDELHRKLP IQPNASIDFKLVIFGEADFLGALTAGPGQTAGYSLPHNPDGM  
NSAGPQSLTVSHGGGGG PLGGGMLSAGGGSGNPSIPSRISSTNTHRRNELLTSSFRSSHSGHSSL  
ATLSVGI STGHVPRQLDAQLRFKYS GGEGLOEGFCRQCAISFNVELLPSAQITNWDVLSAEIP SQF  
YLVLDVVNLTAQEMSLNYTSNK TILIEAKESCRVPVPVQRCPLERIFA AVAEHQQQHNNHLHQHHH  
HHSIGSGSADHNNMPSILSGGAGTSTSDSSDLTERVCSEHISENVNLKWSLPGIDCHGTASLRGIT  
LSPAMLDLVTVPLEWEVKVDDQVVAPQSEVTCVTGQFLSFSISICNLSASVLHQVQLSVQFYQDY  
QNGVQNYRLETRVTMSGPNHILIPSLNKDEKAFHKCSVLFFT

**>g8096\_AIP1\_IndInt**

MHPERNPDALAKLHKNGF EKVEIAVYNVLAREFIYATLPRTQRGQPIVLGGDPKGKNFLYTNGHSV  
IIRNIDNPEIADIYTEHSCAVNVAKYSPSGFYIASGDQSGKIRIWDTVNKEHILKNEFQPIGGPIK  
DISWSPDSQRIVIVGEGRERFGHV FMAETGTSVGEISGQSKPINS CDFRPARPFRIITGSEDNTIG  
VFEGPPFKFKMTKQDHTRFVQAVRYS P SGHLFASAGFDGKVFMYDGT TSELVGEVGS PAHSGGVYG  
VAWKPDGTQLLTCSGDKSCKLWDVETR TLISEFPMGSTVDDQQV SCLWQGNHILSVLSGFINYLD  
VNNPTKPLRVVKGHNKPI TVLTLSDDRSTIYT GSHDGA VTNWNSGSGTNDRVAGVGHGNQINDIRA  
AGDFVYTAGIDDSIKQISVEGNTYTGVD SKLACQPRGMDILKESNTIVVGCVKDITVLQDNRKVSS  
VPISESSSVSINPETMDVAVGGDDSKVHVYTLHEGQLTHKLDLEHLGPVTDVRYSPDNKLLVACD  
ANRKVILYSVAEYKPPHNKEWGFHNARVNCVAFSPNSELVAGSLDTTII IWFVNKPAQHTIIKNA  
HPQSQITGLVWLDNETLISTGQDCNTKVWNIENVA

**>g24355\_IAP\_IndInt**

MDHQYDKGSLLLCLAI FVHKLTI VFWHTQNYLKV LALARVQQRKAGGEVVSSES AAPSSTPKAPG  
DADDDMREMAHALSLPAPIDL PDNKQKDDDLACMSPEYFHIEENRLRTFGRWPVAFISP NVLARYG  
FFFVGTDDTVKCYFCRVEIGLWEPQDDVIQEH LRWSPFCPLLK RPTNNVPLNANYLDAVPEPSYD  
TCGISVRQHSYAENVNDRARPD LDRMSGDSWSGASDISLSSSGSSSHNGGDAEPM SGVSGLSSGGG  
GVGGGGGLQQDRASMTAAEWNNGVLMGEHSLMRRPEYPNYAIEADRLKTYEDWPTSLKQK PQQQLSD  
AGFFYTGKSDRVKCFSCGGGLKDWEQDDEPWEQHAIWYSNCHYLQLMKGREFIEKCNELKEAAAASA  
TSGTSSSMSSASSQPSTSGISSASSVMSTSPASSSGFSSPTPAADEERTLRCTDHYSSGSDEGGE  
DDAGHNRKVPSDGKICKICFVNEYNTAFMPCGHV VACAKCASSVNKCPLCQQPFINVLRLYLS

**>g17640\_JNK\_IndInt**

MSSRHAFYTVEVGDTKFTILKRYQNLKPIGSGAQGIVCHTKAKDRTKPLTKEPRQGQPPPPQQQQQ  
QHTVANMNRANNNYVRVQFGDTEFEV PDRYINLEAKGFGAQGTVCAAYDTVTQONVAIKKLSRPFQ  
NVTHAKRAYREFKLMKLVNHKNIIGLLNAFTPQRTLEEFQDVYLVME LMDANLCQVIQMDLDHERM  
SYLLYQMLCGIKHLHSAGI IHRDLKPSNIVVKS DCTLKILDFGLARTAGTTFMMPYVVTRYRAP  
EVILGMGYKENVDIWSVGCIMGEMIRGGVLFPGTDHIDQWNKII EQLGTPSQSFMARLQPTVRNYV  
ENRPRYTGYPFDRLPDVLFP TDSNEHNRLKASQARDLLSRMLVVDPEHRI SVDQALVHSYINVWY  
DESEVNAPAPGPYDHSVDEREHTVEQWKE LIYQEVMEYEARNNLADATDEAMAAAAEAAEASSTA  
AAAAAAEDLQPPSEEPDAMSPAEE

**>g11102\_p38\_Bsk\_IndInt**

MANFYRTEINKTEWEVDPKYQALTPVGSAYGQVCSAMDTVHNVKVAIKKLARPFQSAVHAKRTYR  
ELRMLKHMNHENIIGLLDVFHPGDNKLESFQQVYLVTHLMGADLNNIIRTQRLSDEHVQFLVYQIL  
RGLKYIHSAGIIHRDLKPSNIAVNEDCELKILDFGLARPTENEMTGYVATRWRAPPEIMLNWMHYN  
QTVDIWSVGCIMAELLTGRTLFPDGDHIIHQNLIMEILGTPNDEFMAKISSESARHYIKSLPKTEK  
RNFSDVFRGANPLAIDLLEKMLELDADKRITAEQALAHYPYLEKYADPSDEPTSSSLYDQSFEDMDLP  
VERWKELVFKEVLNFVPPQHAHIGGEPQA

**>g21984\_AKT\_IndInt**

MTATDNTVRFSDHTLDKATKAKVTLENYYSNLITQHGERKQRQAKLEASLKDETLSESQRQEKRMQ  
HAQKETEFLRLKRSRLGVEDFEALKVIGRGAFFGEVRLVQKKDTGHVYAMKVLKADMLEKEQVAHV  
RAERDVLVEADHQWVVKMYYSFQDSVNLYLIMEFLPGGDMMLLMKKDTLSEECTQFYIVETALAI  
DSIHRLGFIHRDIKPDNLLLDDARGHLKLSDFGLCTGLKKSHTDFYRDLSQAKPSDFIGTCASPMD  
SKRRAESWKRNRALAYSTVGTDPDYIAPEVFLQTYGYPACDWWSLGVIMYEMLMGYPPFCSDNPQD  
TYRKVMNWRETLIFPETPISEEARDTIVKFCCEAERRLGSQRGIEDLKLQVFFRGVDWEHIRERP  
AAIPVEVRSIDDTSNFDEFDPVALEIPAHPQPEGEVLKDWVFINYTFRRFESLTQRARAADTEAKQ  
QQQQHIVSPNPQSIDRPTNGMMAQDRVTG

**>g17088\_IKK\_IndInt**

MSGLHSATFIVRGCAVNRLNIAQPAAFFRYIKTQLSVLCALLQESNRGVSLLVNVLANMIKPFEDP  
PLIGDWCREKRLGNNGGFVSLWRNKQTQQAVALIKKFHILQDRSEITDKHCERWRNEVKLMTETVQ  
NENIVRTVNVQPTSFIQEELLRSSANGLPVLCEMEYCEGGDLRRVLRNRENCSSGLREQDVRDVLRSR  
NAVAYLHSLKITHRDIKPENLVLKQQGERFIYKADLGAKALDKQSLNASLVGTVEYIAPDLIYCD  
RYNCSVDYWSMGVIGYEIITGVRPFIHPAPIRTRMMHVQKKSADIAITEDNRENYTYHTDIFPEN  
HISDCLRKELESWFRLALEWNPKKRGYVPYTKAEPSELANGENGTKGVKQTEDNKPSTVLKIFSLLD  
QILEKRILVLFSLYDCRWIDLEVTPETGMETLRDHVYRVGTGIPVDDIEFVLPLEQKQPAVGNDRP  
YDLYLPDFYGKPMVYVVRHGRSRSIVQRDLKPRIPKSITDVFQNIKVKLKPMLRQFIANSYYFIA  
QEORLYGQVLDGIRNYGLMLNDNIARRKDEIGRMNKIVYAILGGVEYHKLTVCHARDALNVERRIP  
SATFEMASKRWIENGARIESNVRKLAEMADTITKRYESVLKRSRDALRHALLHPQLDQHDTFGLRN  
VECRYEQTRARLMEKILNEKSHMDMSQAVYECLKQRDVLRELGFLELQQQIILDVRREIQEIEKV  
CKVIDVTEKYKRDARLKLKLEHQDEVWKMMSDYGRSAAAGSCENGVVHLDNIIPLGVAHTDPPVINK  
PNFLVGGPTTPQLQSTVSNESFDANQVCCLYTDPNVEDLIAANETLIHTTTDLLSNSFSLKLAD  
GAE

**>g13192\_Caspase1\_IndInt**

MEEFALSASLRHSTDELDANAVNRSTNSAIPALSTSNVDVTAQGSDDHYDTSHPRRGIALIINQVNF  
KDLRKRKDGSDKDRDCISAALQGIGFEIRTLDDPNRKELLAMLEKVANEDHSQHDCLVVVVMTHGKE  
NNFLYARDKSYEADRLWEPFLGNACPSLRGKPKLFFVQACRGKQLDQGVRLVNMSIDENSVDSVP  
EPVSYVIPTMADLLVMYSTYDGHYSWRNPVNGSWFIQSLSIVLTATAHREELLHILTAVSRRVAFH  
YQSDVPQNVKMDAMKQMPICIVSMLTKLLYFPKKS

**>g22865\_NFkB\_IndInt**

MSLDHCSIALDVLQLLQLOQQQQQQPPRLDVPYSLQTEQQQQLLGASPNQYTIILSMDAPSAAAA  
VVSVDYTLGSSRSYASALSPSSSSASPSPPSSVASPNSRASNMSPQSSASDHSASYTLQNLNLSS  
STSSMGYPGMSYQQQQQHQPQHQQHHQQQHQQHHQQHQQQIQPQQQHYAPQLLNLDQEHLOTAS  
FSYTTSSNEAFASPDADYGKPHLVILEQPVDKFRFRYQSEMHTGSLMGSRTKESKKTFFPTVELR  
GYSGEAKVRCSLYQVDPQRRAPHSHHLVIKSGELDLIDPHDLVDVGGPTGESSDGGGGGGGGGSYVA  
TFQGMGIHTAKKFAEELYKCLRKHRLCELNREPTEREEQQMQKDATVMARTMNLNQQVCLCFQAY  
RVEPGTGRWVPICEPVYSNAINNMKSALTGELKICRLSTTVSGVDGGEEVFMFVEKVKCKNNIKIRF

YELDEYDQEVWQEMAI FSEADVHHQYAI AFKTPPYRNKDITEPVEVHMQLYRPRDRQCQSEPVLFKY  
KPRSGMMVPGSSGSGSRKRLRISSGNISSEIPTVIQNDPNAGGGGGGGVPGAGGGGGAGGGGAGS  
TTRLPLHQPFPM LANHDGSIPEGHEPSSAATINAGTATGHQQDIMSGIGSVTTISKELTKASIIQ  
EILNIPTTIASDVAFDSSDFPCNSEEFNKLIQEIGNQQDLVKLET DSEAAAAGDTTESVLGRAIADL  
VASGDDARQGEMLRKL LALIKLFAGDVNRSRQLLASHWTAANQQQLNCLHAAIRRNDTTIACKLIE  
LLDEFRLTDEL LLDLPNDRNETALHLAVSTNNESIVRELLKAGAKLTFCDYRGNTALHRAVVENVPA  
MVRLLLRHGQAGRSRLDCTNDDGLTALQAAVYARNLKITRILIDAGASVREKDLKHGNNILHIAVD  
NDSL DIVNYVLEHVNRELGLEQNNAGYTPLQLADAKSATGQGNNKLIVRELLRHFPDGLEKRTAGD  
DSQEQEEDIDEDEEEEEEEEEDEEEEREGEAIEQDKEQKNETVLD SINLNC DRVNIARLLEEHEPEA  
EPQRKATKRSDATTATERKEPAAASAPLFDQCEELCELLSGSETWRALGSLLDHFHFFTVWEQG  
PSPARMLLGYEMQQLNMDRLIDMLRALELRDCIRSIDEMICRRMK

**>g376\_MKK3\_IndInt**

MYGSVSPDLLLIVLRFL LGAARDAVPFWRFGVLVWTF TLYDDDQVKDVFSQRSTGELSLEAHGAGP  
GLKWHQDTLAATSTNRGEQEEKEGGSQQPTNNNTNEARKVFLLSVGVSLVWAVAAAERYLHCRAT  
PPPPSPSAPKMPKPKPIIKLKL DGD TGGGSTVPDSAEGATPRNLDKRGTTLTVGERSFVVEADHLR  
KLADLGRGAYGIVEKMLHQPSGTVMAVKRITVTSGMGAGGGGLGGGVQSQEQRLLMDLDVSMRAS  
DCRHTVQFYGALFREGDVWICMEVMDTSDVKFYPVVYKRPGRITPERILGRIALAIVRALHYLHTE  
LRVIHRDVKPSNVLMNRRGEVKMCDFGISGYLVDSVAKTIDAGCKPYMAPERIDPSSCSRTAGYDI  
KSDVWSLGITMVEIATGRFPYATWRTPFEQLKQVND EPPRLPKSAAPDSEEFSAEFHAFTASCLQ  
KKFQQRGNYEQLLAMEFLQRYGAGDVQADTSDMAEYVCAILDERDGVPAEEDGGGELAN

**>g20745\_JUN\_IndInt**

MRNNVLNSKHTNNNTMESFYEDNNAQFVPSTTTTNGVTTGNGNGLKRPATLELNLAPGKARKTRYN  
ASVTMPSVLPS PDMQMLKLV SPELEKII STNATLPTPTPSAII FPPSATSEQQQFAKGFEDALLSI  
HKKDTT SKLNTNNNNNNNSNTSNNNNGPSANIGGAPAERLCPTTAAPT TVVPVVGTTTTNNLAST  
VLASGHNNGMSGGEITYTNLDYPGVVKEEQATSSNQSPVSPIDMESQERIKLERKRLRNRVAAS  
KCRRRKLERISKLEERVKELKTQNSELSGVVCSLQHI FQLKQQVIEHHNNGCTITLVGKF

**>g7769\_RAC1\_IndInt**

MSSGRPIKCVVGDGTGKTCMLISYTTDSFPGEYVPTVFDNYSAPMVVDGVQVSLGLWDTAGQED  
YDRLRPLSYPQTDVFLICYSVASPSFENVTSKWYPEIKHHC DAPIILVGT KIDLREDRETISVL  
AEQGLSALKREQQQKLANKIRAVKYMECSALTQRGLKQVFDEAVRAVLRPEPLKRRQRKCVVIEMQ  
TMASGVAGNAEKETATINPREACKVNNEATKRLTNVGS

**>g4935\_MAPK\_IndInt**

MSMNEGIAVVTKVVSTSVRRAPEPTAVLTREDFNAGPISLDEIEPGLWLGNASAAADMGTLEKHTI  
RSILSIDSVPLPVHITDHPNLRVRHIQAADV PREDLIRHFEDSNRFIVDSLAEGRHVLVHCYFGVS  
RSATIVIAYVMQKYRLNYEAAFQRVKAKRIFVMPNPGFVNQLKLYGRMAYRIDRTNERYKLFRLRL  
AGDNVRKAKRLPTECMDVVKTDPGVTQESPEPYVYRCRKRRVVASRSNLLLHKPKSATLAQSPAK  
VGREPEATLEEEGTSDEAECDGQPQMNADGENVADHVTHVQTAVATGSSPSSGGGMNELAEQVRRS  
SISSEHSNRSSEKDTPMC NKIFFIEPLAWMTDIYRNTQGRLYCPKCTVKLGSFNWVMATKPCGAE  
IYPAFYLVPSKTEYSTVVQNVQVTV

**>Intsfg7581\_Erk\_IndInt**

MAEAASSGAAAAAASAAGPAAGSTSATNPNAEVIRGQVFEVGP RYTNLAYIGEGAYGMVVSATD  
TVTKTKVAIKKISPFHQTYCQRTLREIKILTRFKHENRLSNDHICYFLYQILRGLKYIHSANVLH  
RDLKPSNLLLNTTCDLKICDFGLARVADPEHDHTGFLTEYVATR WYRAPEIMLNSKGYTKSIDIWS

VGCILAEMLSNRPIFFPGKHYLDQLNHILGVLGSPSQEDLECIINEKARSYLQSLPYKPKVPWSRLF  
PNADLNALDLLGKMLTFNPHNRISPVAEEPFRIAMELDDLPKEMLKRLIFDETLLRFNHNDNNLPGG  
M

**>g14460\_TRAF4\_IndInt**

MKFPLLVRLLCPGVAPSHDHLGSVSPRSKILGALVPAVCELAVRKSVDVIYDPPESEKAIMGSLVFCI  
HHKQGCKWSDELRLKKAHLNLTCKHDAIQCPNKCGSQIPRVMMTDHLAFTCILRRAICEFCNVEFTG  
IGLEEHAGTCSSEPIYCESKCGTRVLRGRMSIHRAKDCAKRLRRCPHCGREFSADTLAAHGATCPR  
SPIPCPQRCDAGPFARADLDAHLRDECKALTVPCTFKEAGCRFKGPRHLLLEAHLETNTSAHLSLMV  
ALSGRQGGQINMLKSAMAKLSTNYTGTLWKITDWSVKMQEAKTKDGLELVSPPFYTSQYGYKLQA  
SMFLNGNGPGEGTHVSVYIKVLPGEYDALLKWPFSHSVTFTLFEQGTLGSGGGGGQGGVAESFVDPD  
TWENFQRPSTEPDALGFGFPRFVSHHELLNRRPFVRDDTVFLRVKVDPSKIVAV

**>g488\_FOS\_kayak\_IndInt**

MRSVRGSTLYGLGIIAFAWLAPATHHNIHKAVQGACPLAVAWWRFASFDDGIGVHSGVPTRTTPTLT  
PTTLKNIEQTFMEATNAQINLPYQAGFVPPSPYPMEDHSQDGGVSQESLSSNSNGSWAVSGSHGYTG  
DDHDSKSSASLEQPSSGTRRRSATGTDENAKNETVTFAIGTGGSGTGARTGGRNVGGRRPHKPS  
NLTPEEEEEKRRIRRRERNKQAAARCRRRREDHTNELVDETDQLEKKRQSLAQEIQQQLQEKDDLEFL  
LETHREHCRLQARRSPIDLKPVLDLDTGGFENTGTFVLPKIKTEPEDEFAAAAAAAAAATQQHHQPP  
PPNQLQEQLAIEAAEHGTISKKLKLSHAHSDSLETPTPTSSAFAPLAGVGLAGNSGNKLSATPAGS  
NGSRPTRPDSLVDKSAQYPLIARGDAAGSLAISTPSSGLFNFDSLMEGGTGLTPIAAPI SFPNPNR  
NPLELITPTSTEPSKLC SL

**>g17088\_IKKB\_IndInt**

MSGLHSATFIVRGC AVNRLNIAQPAAFFRYIKTQLSVL CALLQESNRGV SLLVNVLANMIKPFEDP  
PLIGDWCREKRLGNNGGFGVVS LWRNKQTQQAVAIKKFHILQDRSEITDKHCERWRNEVKLMTETVQ  
NENIVRTVNVQPTSFIQELLRSSANGLPVL CMEYCEGGDLRRVLRVENC SGLREQDVRDVLRSR  
NAVAYLHSLKI THRDIKPENLV LKQQGERFIYKADLG YAKALDKQSLNASLVGTVEYIAPDLIYCD  
RYNCSVDYWSMGVIGYEIITGVRPFI PHAPI TRWMMHVQQKKSADIAITEDNRENYTYHTDIFPEN  
HISDCLRKELESWFRLALEWNP KKRGYVPYTKAEP SLANGENGTKGVKQTEDNKPSTVLKIFSLLD  
QILEKRILVLFSLYDCRWIDLEVT PETGMETLRDHVYRVGTGIPVDDIEFVLPLEQKQPAVGNDTRP  
YDLYLPDFY GPKPMVYV VHRGSRDSIVQRDLKPRI PKSITDVFQNIKVKLKP HMLRQFIANSYYFIA  
QEQRLYGQVLDGIRNYGLMLNDNIARRKDE IGRMNKIVYAILGGVEYHKLT VCHARDALNVERRIP  
SATFEMASKRWIENGARIESNVRKLAEMADTITKRYESVLKRSRDALRHALLHPQLDQHDTFGLRN  
VECRYEQTRARLMEKILNEKSHMDMSQAVYECLKQRDVLRLRELGFLELQQQILDVRREIQEIEKVV  
CKVIDVTEKYKRD LARLKL EHQDEVWKMLSDYGRSAAAGSCENGVVHLDN ILPLGVAHTDPPVINK  
PNFLVGGPTTPQLQSTVSNESFDANQVCC LGYTDPNVEDLIAANETLIHTTTDLLSNSFSL LKLAD  
GAE

*Supplementary Text 2 : FASTA sequences of the genes from the IndInt strain involved in eiger mediated TNF pathway.*
